# Supplementary material for: Syntheses and properties of core-substituted naphthalene bisimides with aryl ethynyl or cyano groups
Source: Royal Society of Chemistry journal article supplement (doi:10.1039/b704489e), 2007-01-01
Supplement: b704489e.pdf [file b704489e.pdf]

# Supporting information for

## Syntheses and properties of core-substituted naphthalene bisimides with aryl ethynyl or cyano groups

Stéphanie Chopin, Frédéric Chaignon, Errol Blart, Fabrice Odobel\*

Université de Nantes, Nantes Atlantique Universités, CNRS, Faculté des Sciences et des Techniques, Laboratoire de Synthèse Organique (LSO), UMR CNRS 6513, 2, rue de la Houssinière – BP 92208 – 44322 NANTES Cedex 3 ; E-mail address : Tel : (33)-2-51-12-54-29.

### Contents

- Figure S1:  $^1\text{H}$  NMR spectrum of **2** in  $\text{CDCl}_3$  at 298 K. Page S1
- Figure S2:  $^{13}\text{C}$  NMR spectrum of **2** in  $\text{CDCl}_3$  at 298 K. Page S2
- Figure S3: FTIR spectrum of **2** in KBr pastille at 298 K. Page S3
- Figure S4:  $^1\text{H}$  NMR spectrum of **3** in  $\text{CDCl}_3$  at 298 K. Page S4
- Figure S5:  $^{13}\text{C}$  NMR spectrum of **3** in  $\text{CDCl}_3$  at 298 K. Page S5
- Figure S6: FTIR spectrum of **3** in KBr pastille at 298 K. Page S6
- Figure S7:  $^1\text{H}$  NMR spectrum of **4** in  $\text{CDCl}_3$  at 298 K. Page S7
- Figure S8:  $^{13}\text{C}$  NMR spectrum of **4** in  $\text{CDCl}_3$  at 298 K. Page S8
- Figure S9: FTIR spectrum of **4** in KBr pastille at 298 K. Page S9
- Figure S10:  $^1\text{H}$  NMR spectrum of **5** in  $\text{CDCl}_3$  at 298 K. Page S10
- Figure S11:  $^{13}\text{C}$  NMR spectrum of **5** in  $\text{CDCl}_3$  at 298 K. Page S11
- Figure S12: FTIR spectrum of **5** in KBr pastille at 298 K. Page S12
- Figure S13:  $^1\text{H}$  NMR spectrum of **6** in  $\text{CDCl}_3$  at 298 K. Page S13
- Figure S14:  $^{13}\text{C}$  NMR spectrum of **6** in  $\text{CDCl}_3$  at 298 K. Page S14
- Figure S15: FTIR spectrum of **6** in KBr pastille at 298 K. Page S15
- Figure S16:  $^1\text{H}$  NMR spectrum of **7** in  $\text{CDCl}_3$  at 298 K. Page S16
- Figure S17:  $^{13}\text{C}$  NMR spectrum of **7** in  $\text{CDCl}_3$  at 298 K. Page S17
- Figure S18: FTIR spectrum of **7** in KBr pastille at 298 K. Page S18
- Figure S19: Overlay of the electronic absorption (dashed line) and emission (straight line) spectra of **4** recorded in dichloromethane. Page S19
- Figure S20: Overlay of the electronic absorption (dashed line) and emission (straight line) spectra of **6** recorded in dichloromethane. Page S20
- Figure S21: Overlay of the electronic absorption spectrum of **3** in pure dichloromethane (thin straight line), in dichloromethane +  $\text{HPF}_6$  (dashed line) and emission spectrum in dichloromethane +  $\text{HPF}_6$  (bold straight line). Page S21

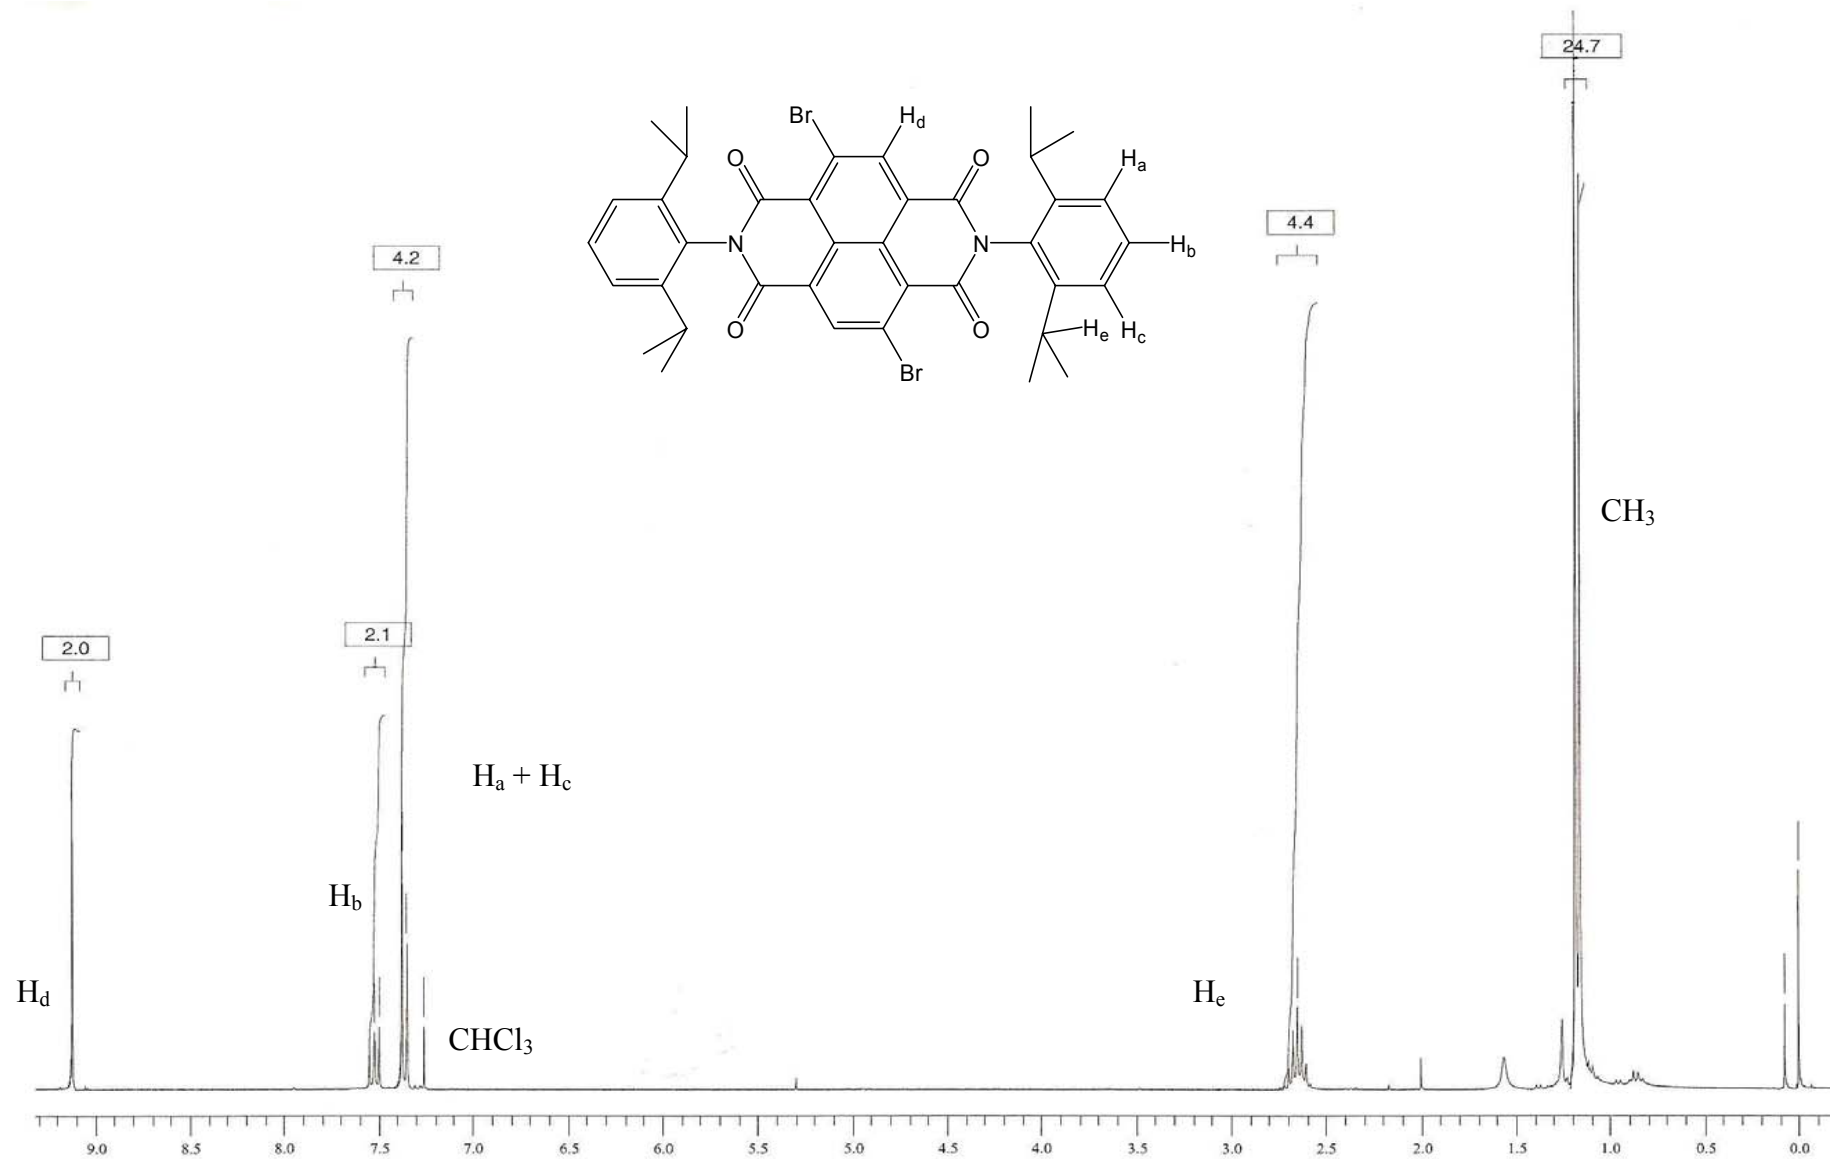

Figure S1:  $^1\text{H}$  NMR spectrum of **2** in  $\text{CDCl}_3$  at 298 K.

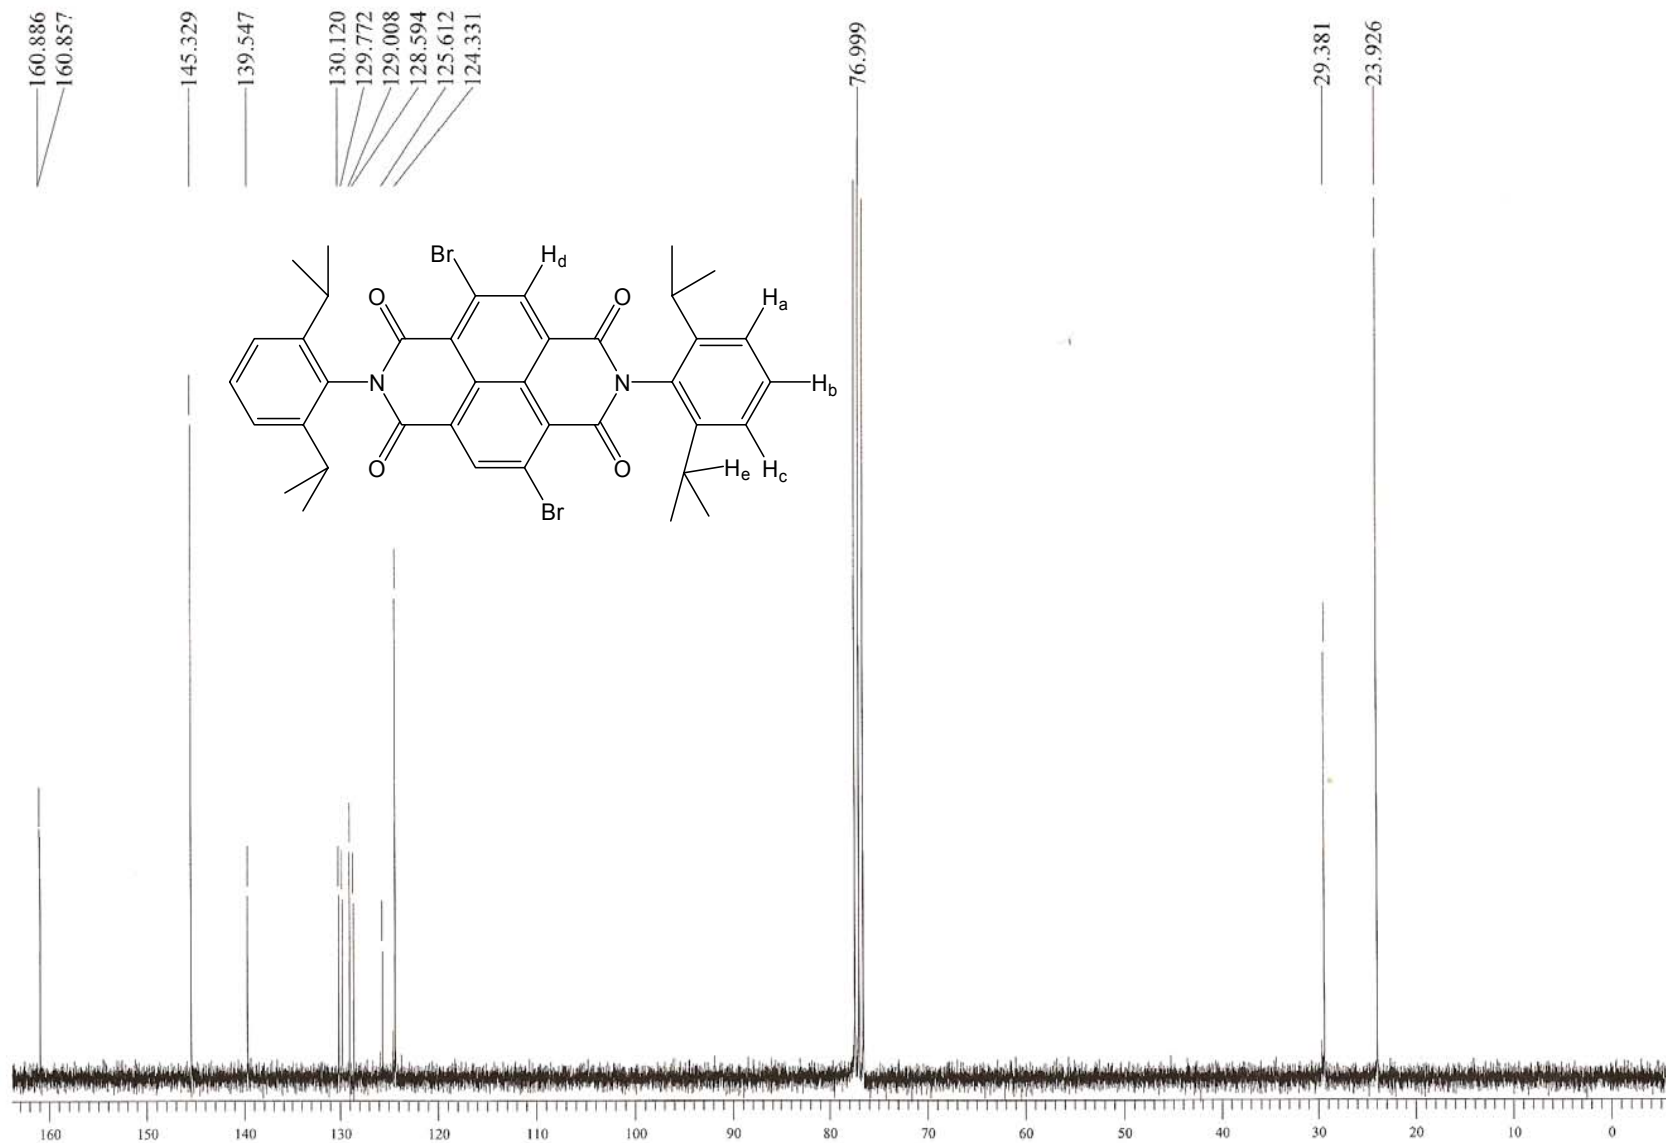

Figure S2 :  $^{13}\text{C}$  NMR spectrum of **2** in  $\text{CDCl}_3$  at 298 K.

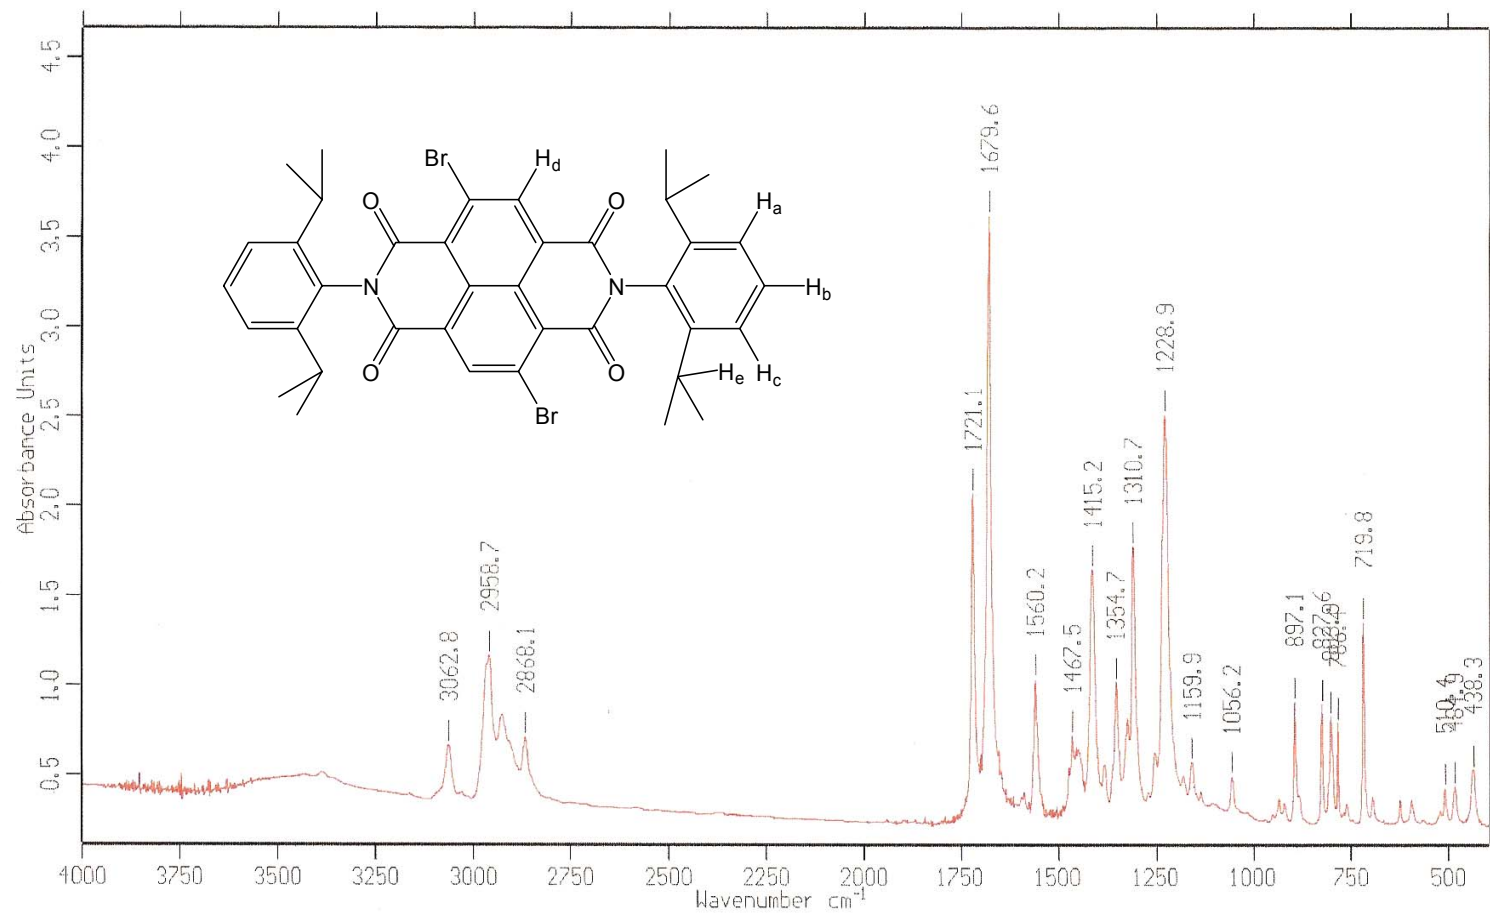

Figure S3 : FTIR spectrum of **2** in KBr pastille at 298 K.

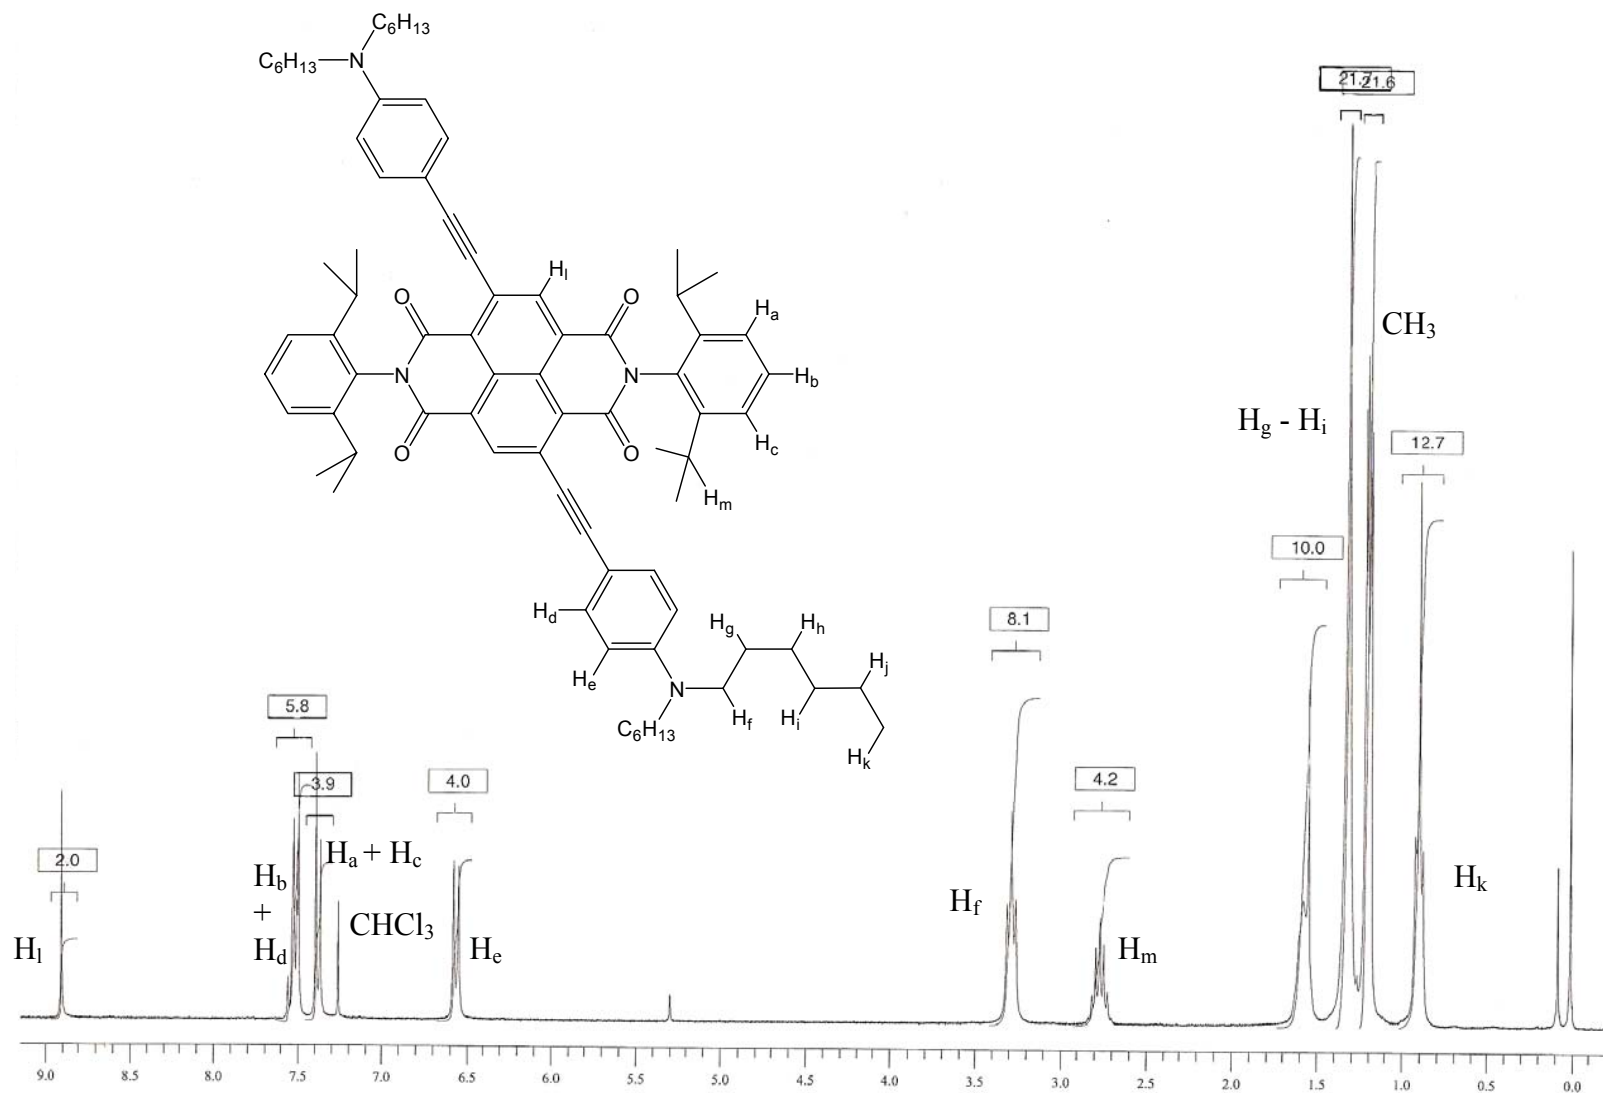

Figure S4:  $^1\text{H}$  NMR spectrum of **3** in  $\text{CDCl}_3$  at 298 K.

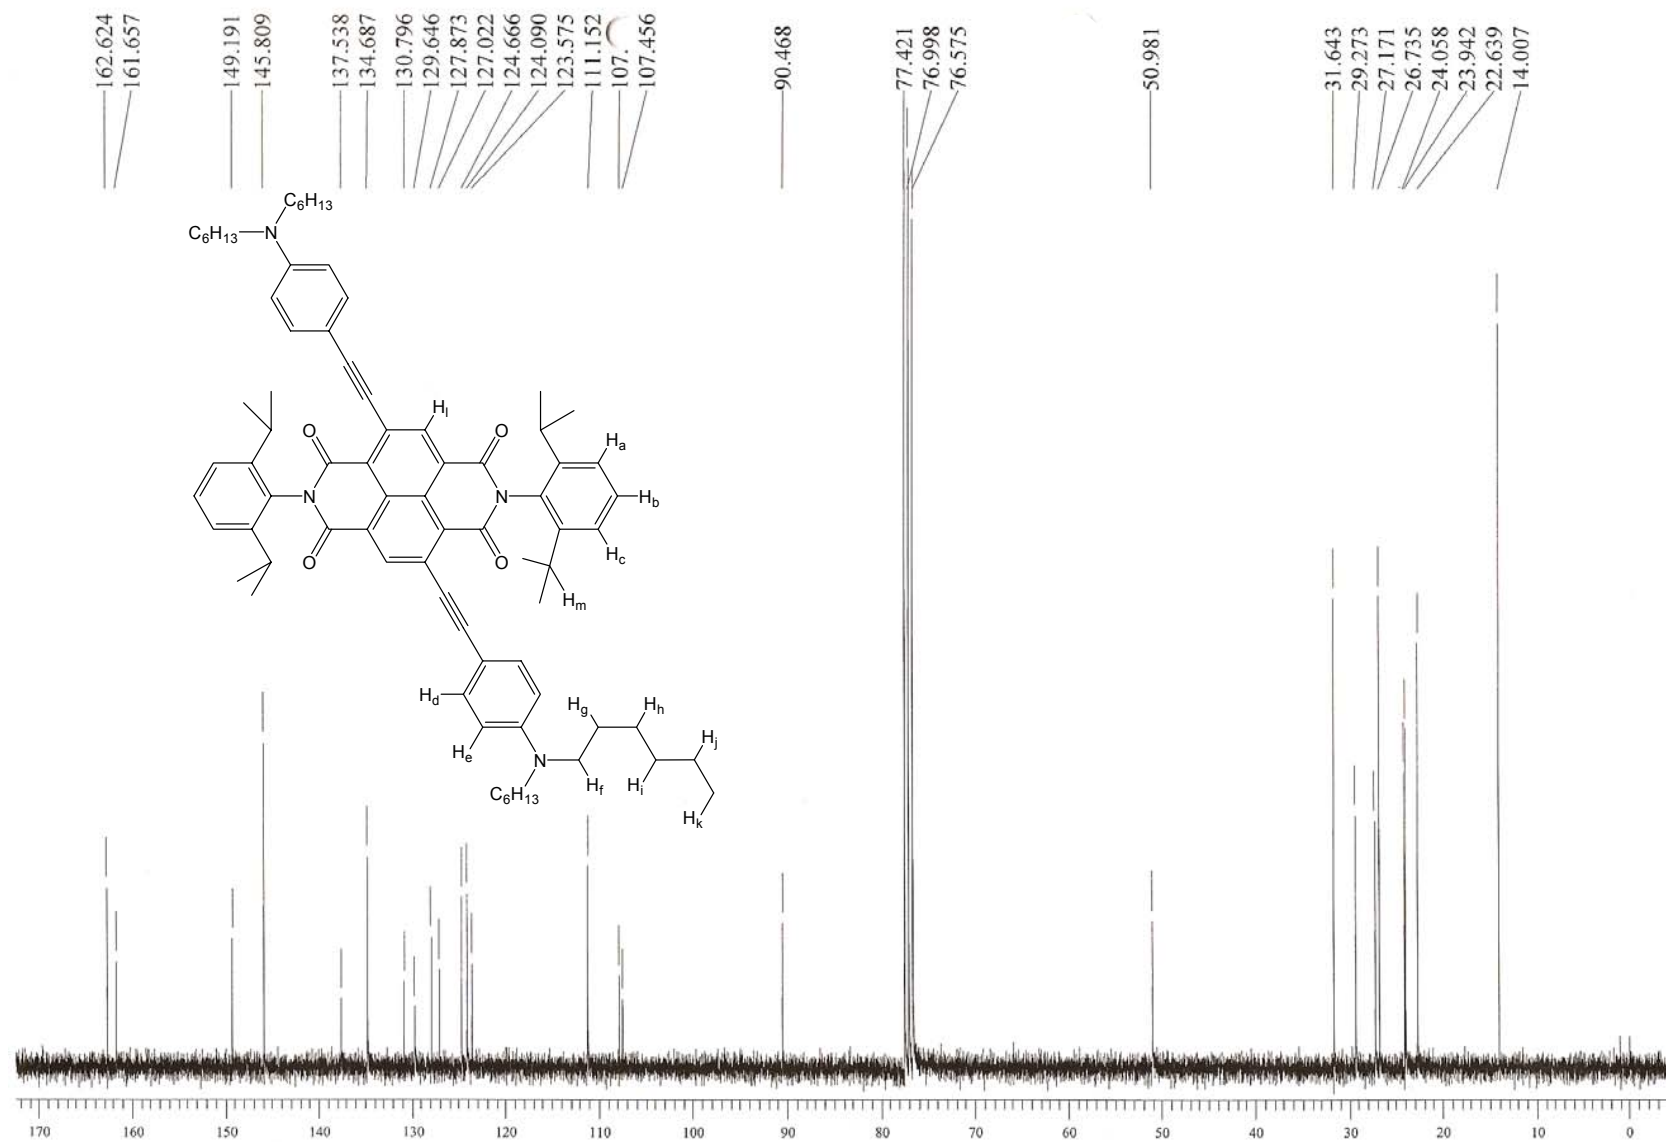

Figure S5: <sup>13</sup>C NMR spectrum of **3** in CDCl<sub>3</sub> at 298 K.

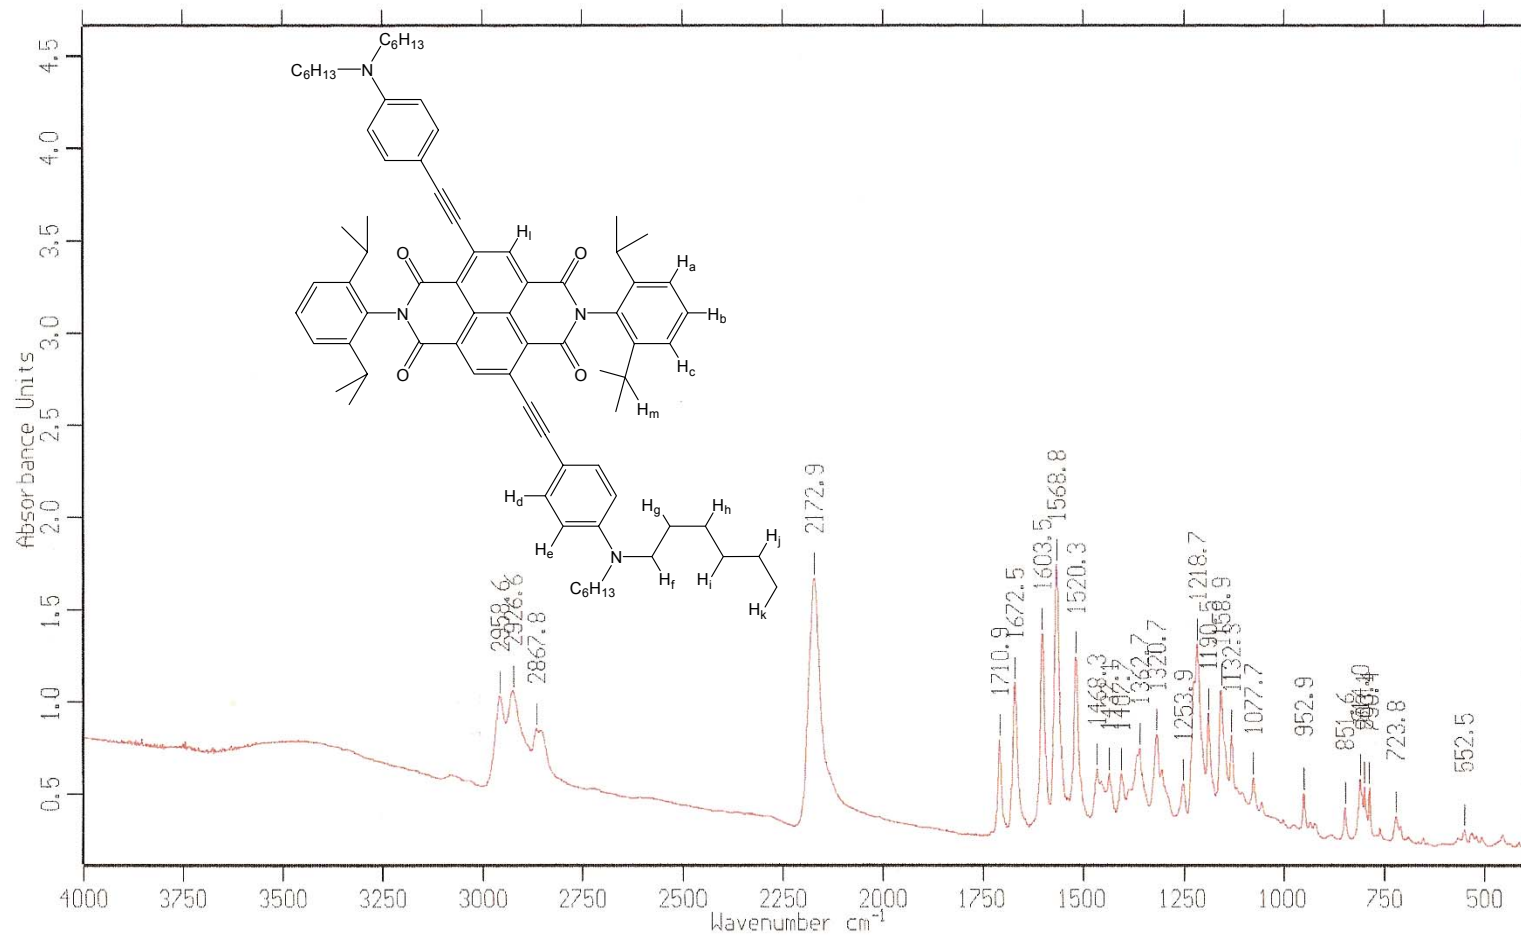

Figure S6: FTIR spectrum of **3** in KBr pastille at 298 K.

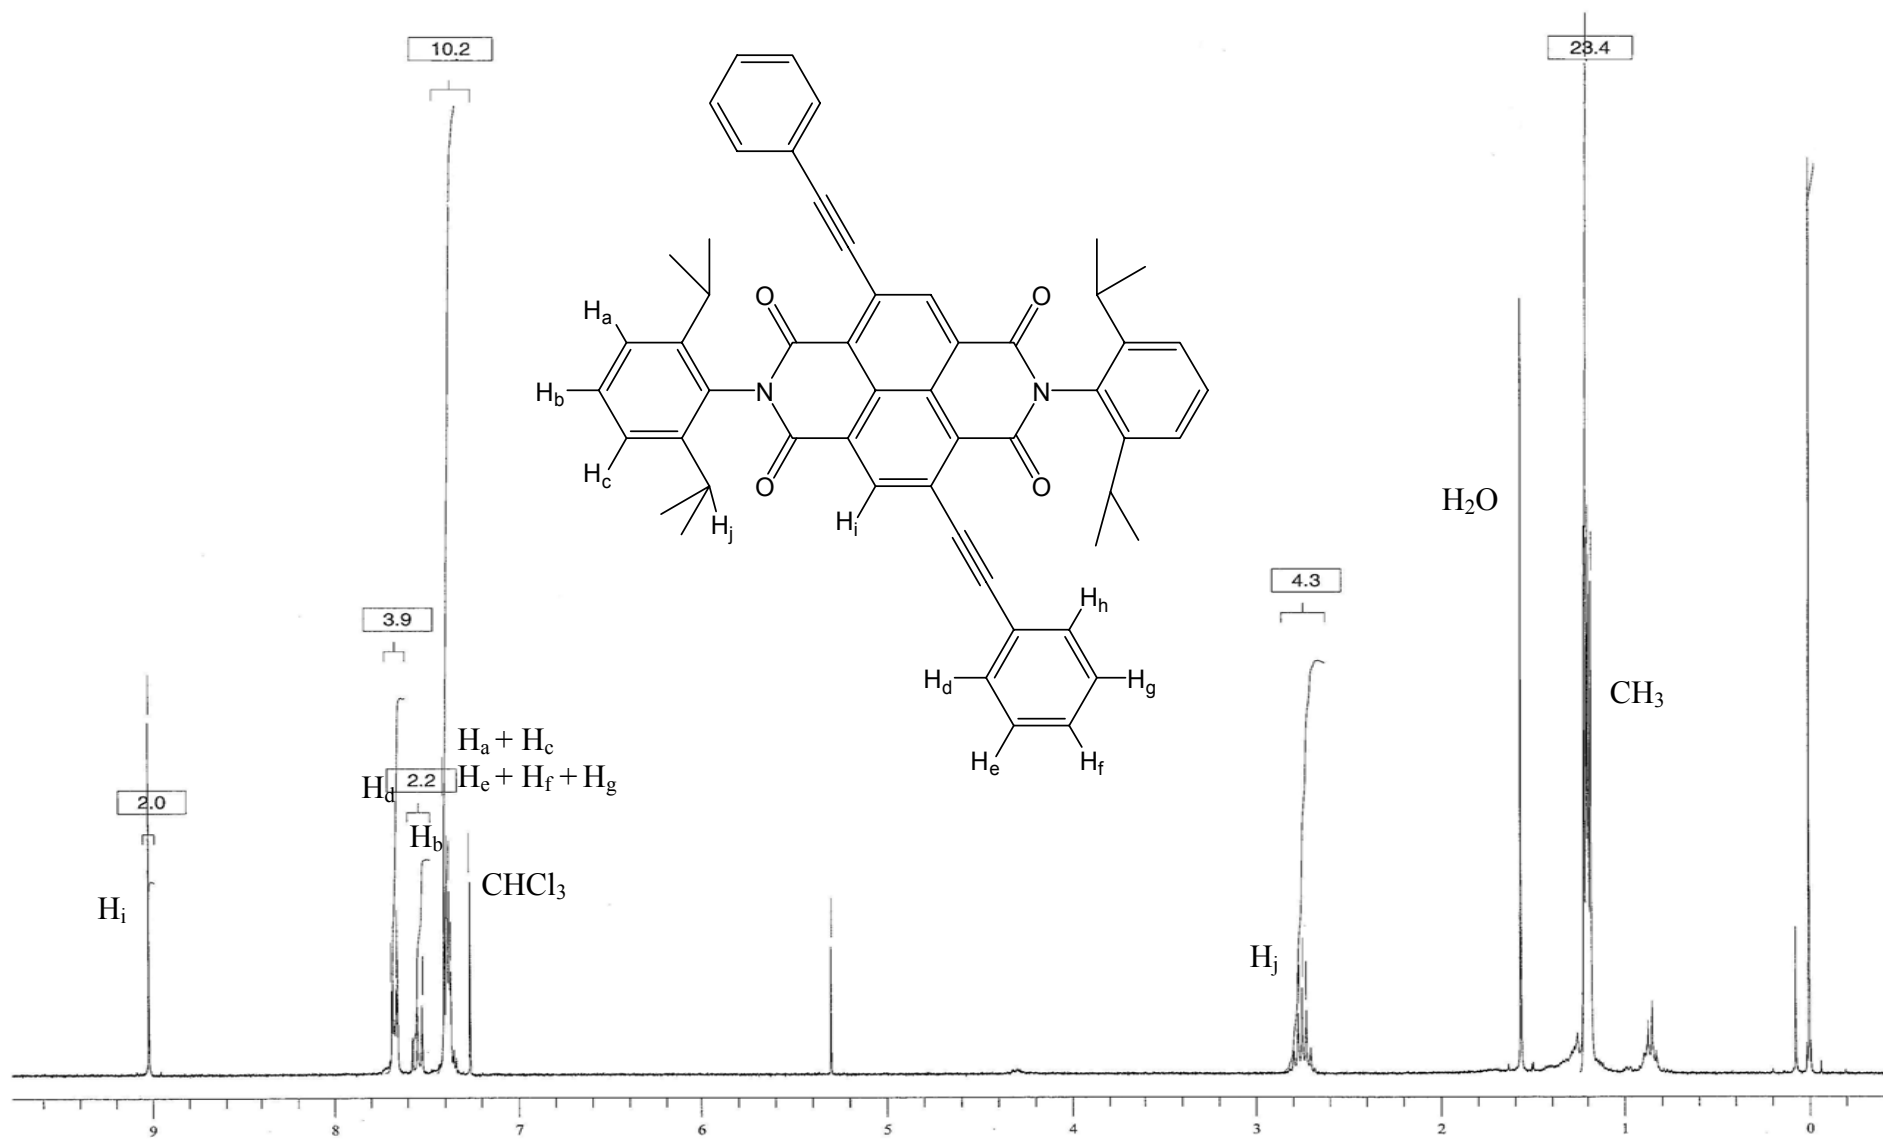

Figure S7:  $^1\text{H}$  NMR spectrum of **4** in  $\text{CDCl}_3$  at 298 K.



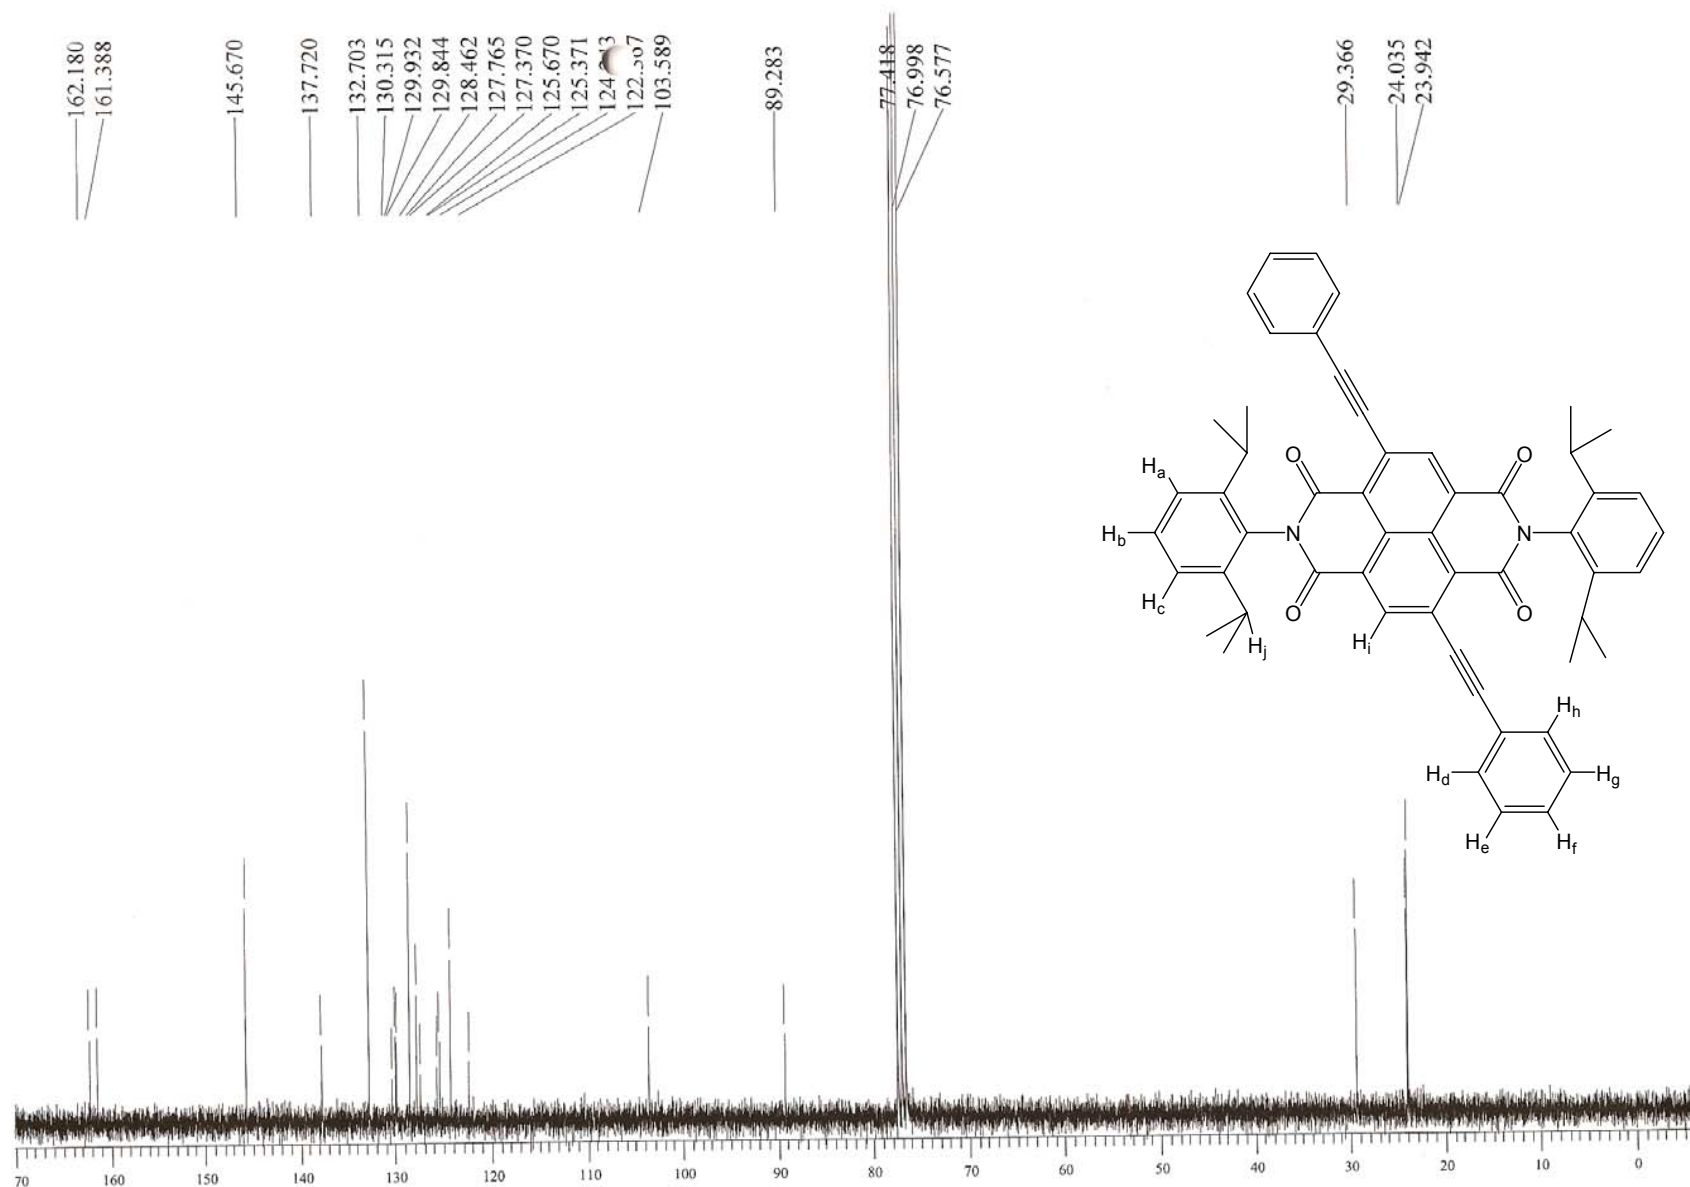

Figure S8 :  $^{13}\text{C}$  NMR spectrum of **4** in  $\text{CDCl}_3$  at 298 K.

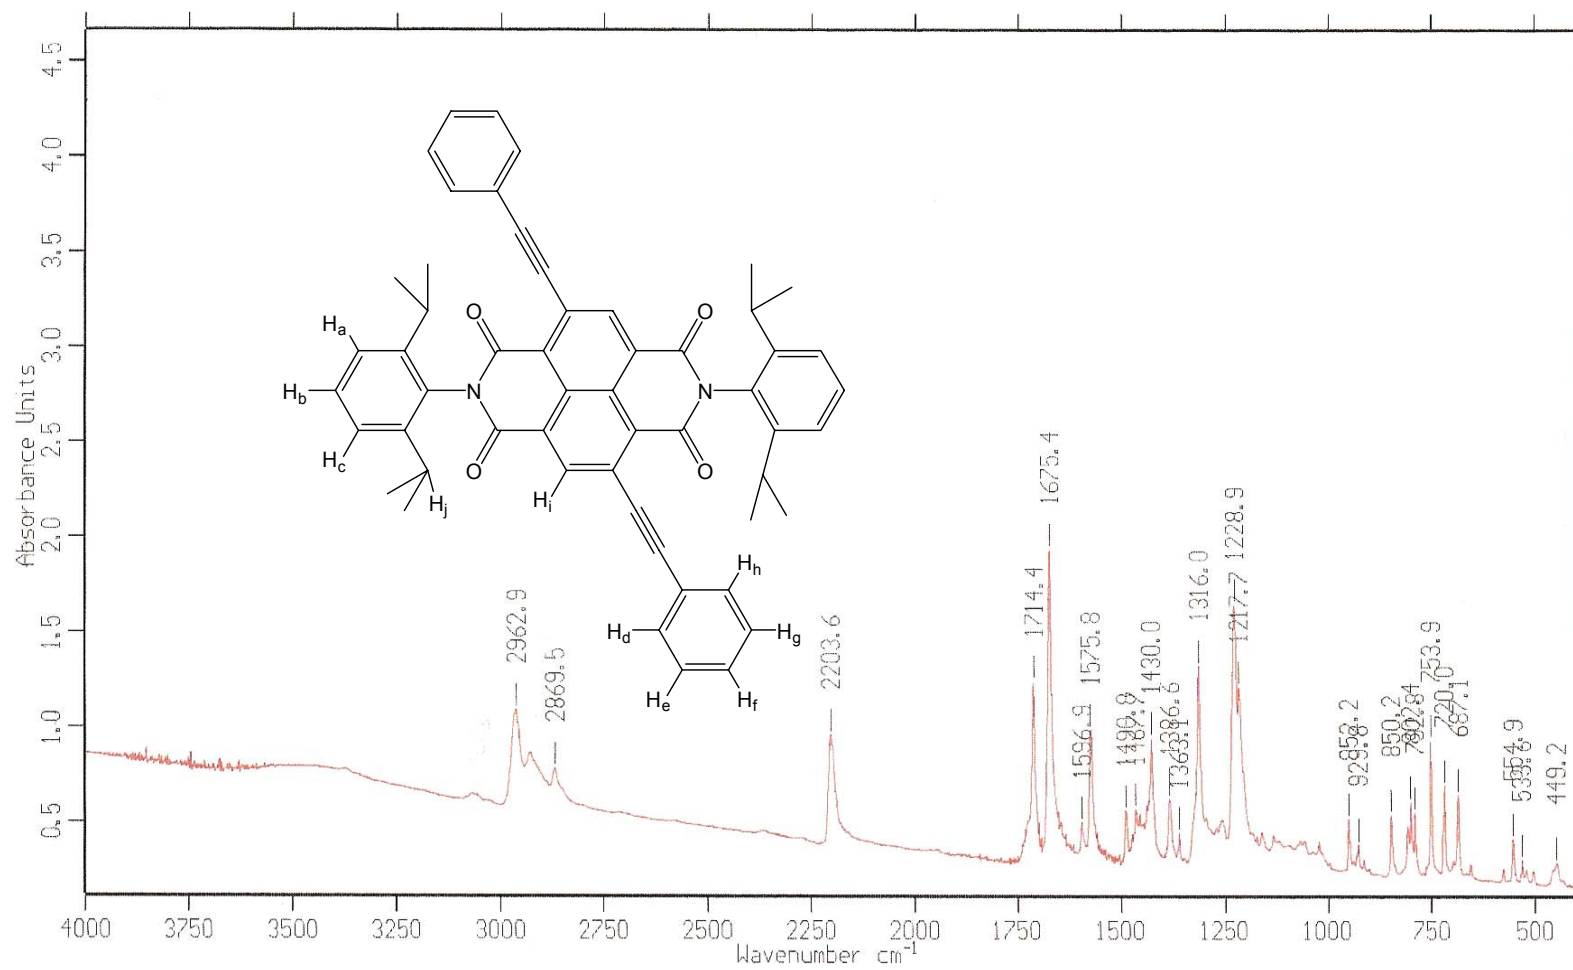

Figure S9 : FTIR spectrum of 4 in KBr pastille at 298 K.

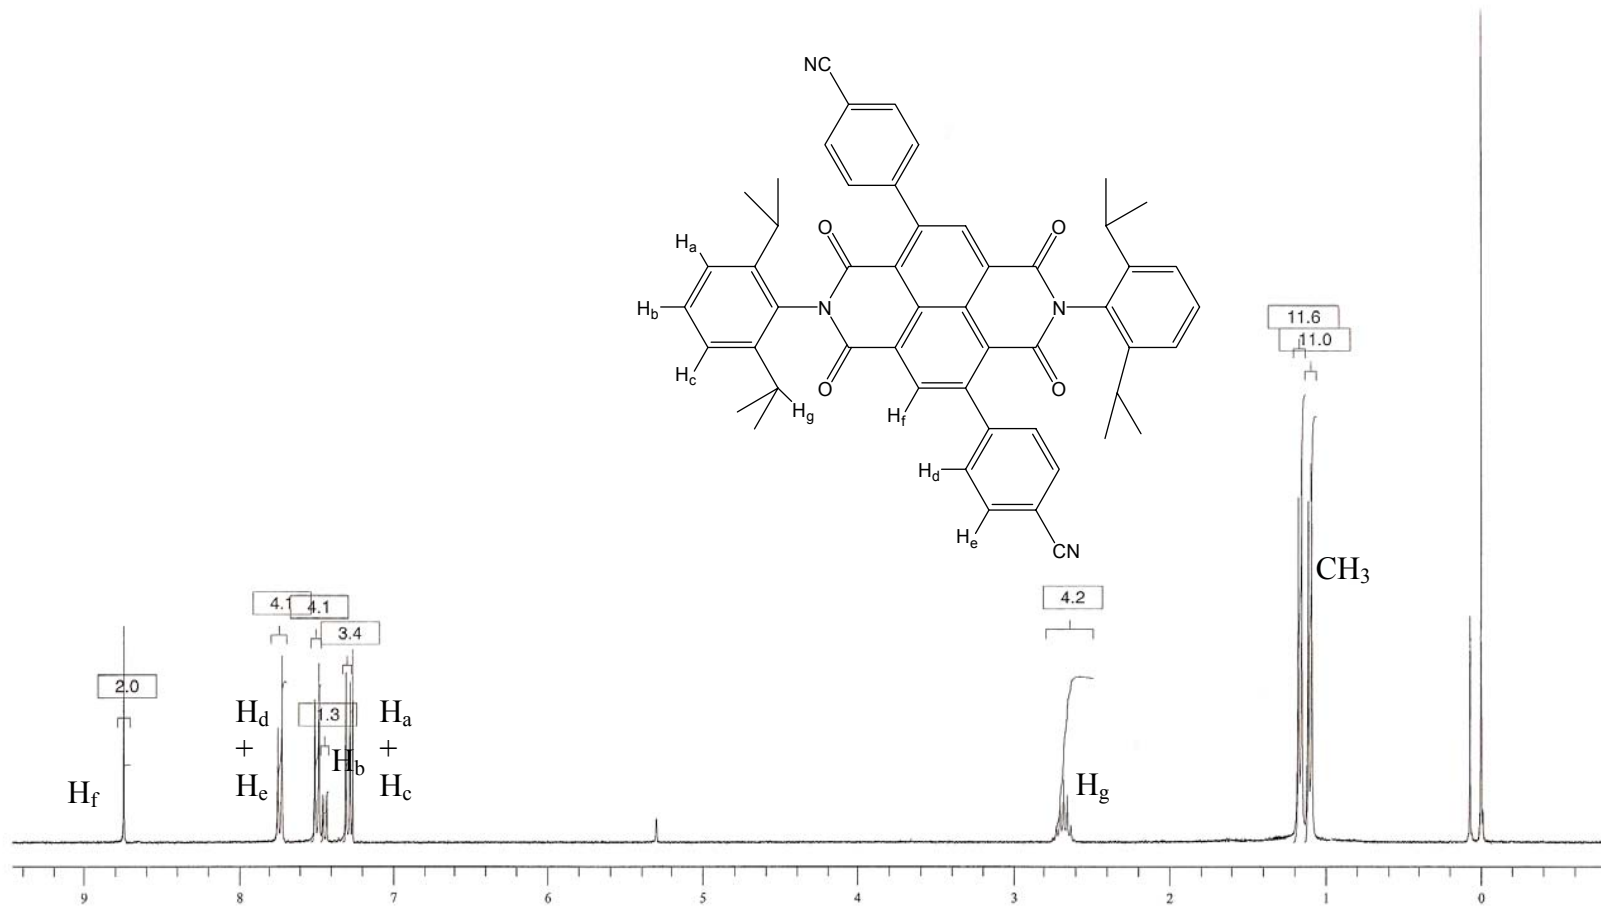

Figure S10:  $^1\text{H}$  NMR spectrum of **5** in  $\text{CDCl}_3$  at 298 K.

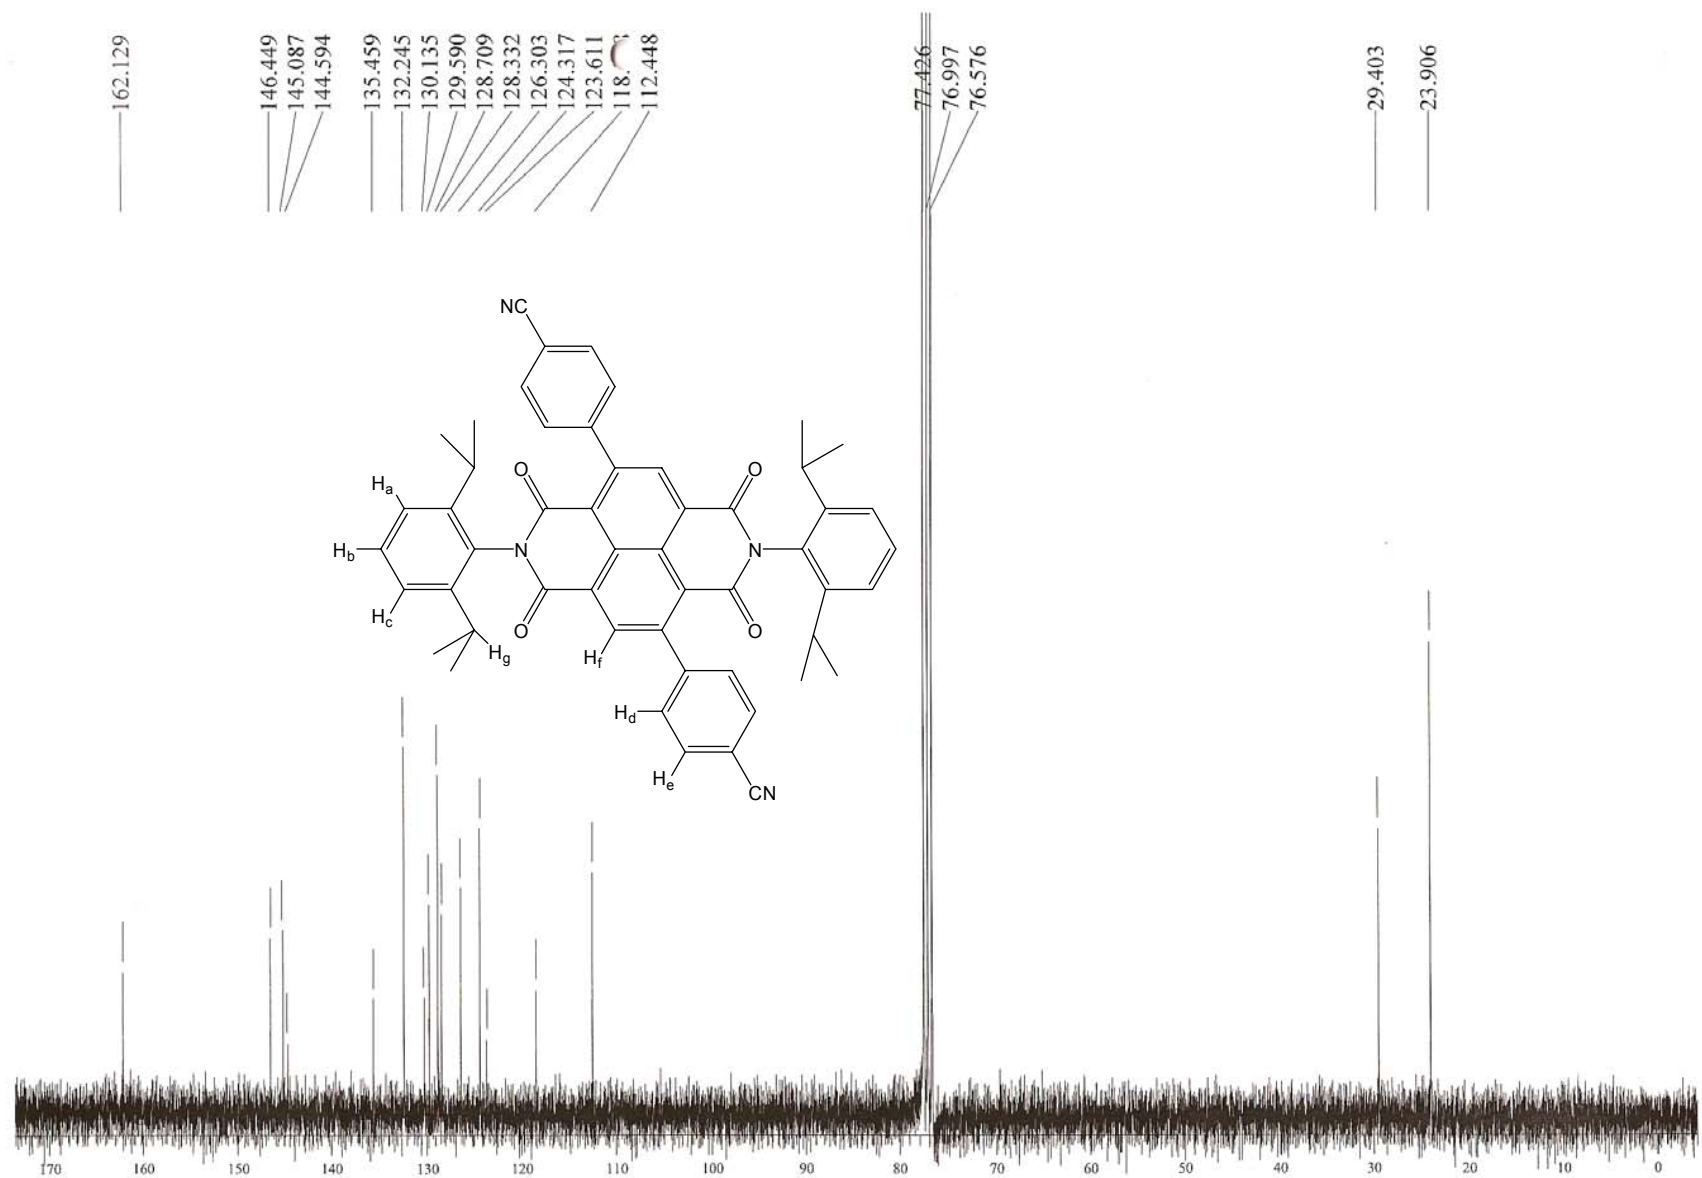

Figure S11:  $^{13}\text{C}$  NMR spectrum of **5** in  $\text{CDCl}_3$  at 298 K.

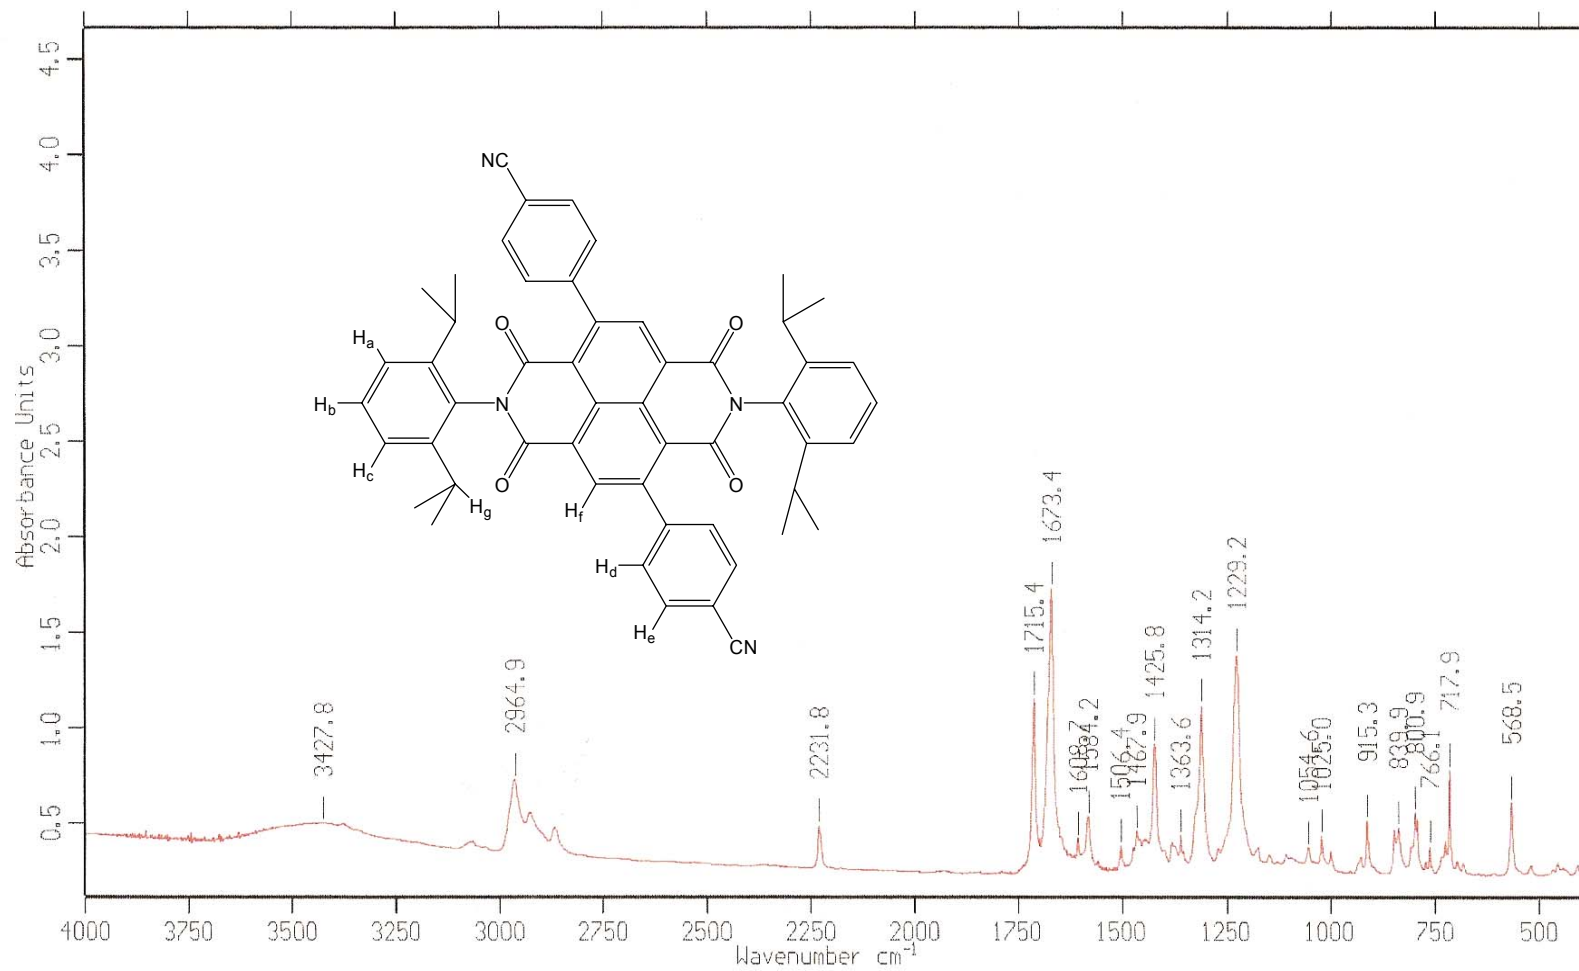

Figure S12: FTIR spectrum of **5** in KBr pastille at 298 K.

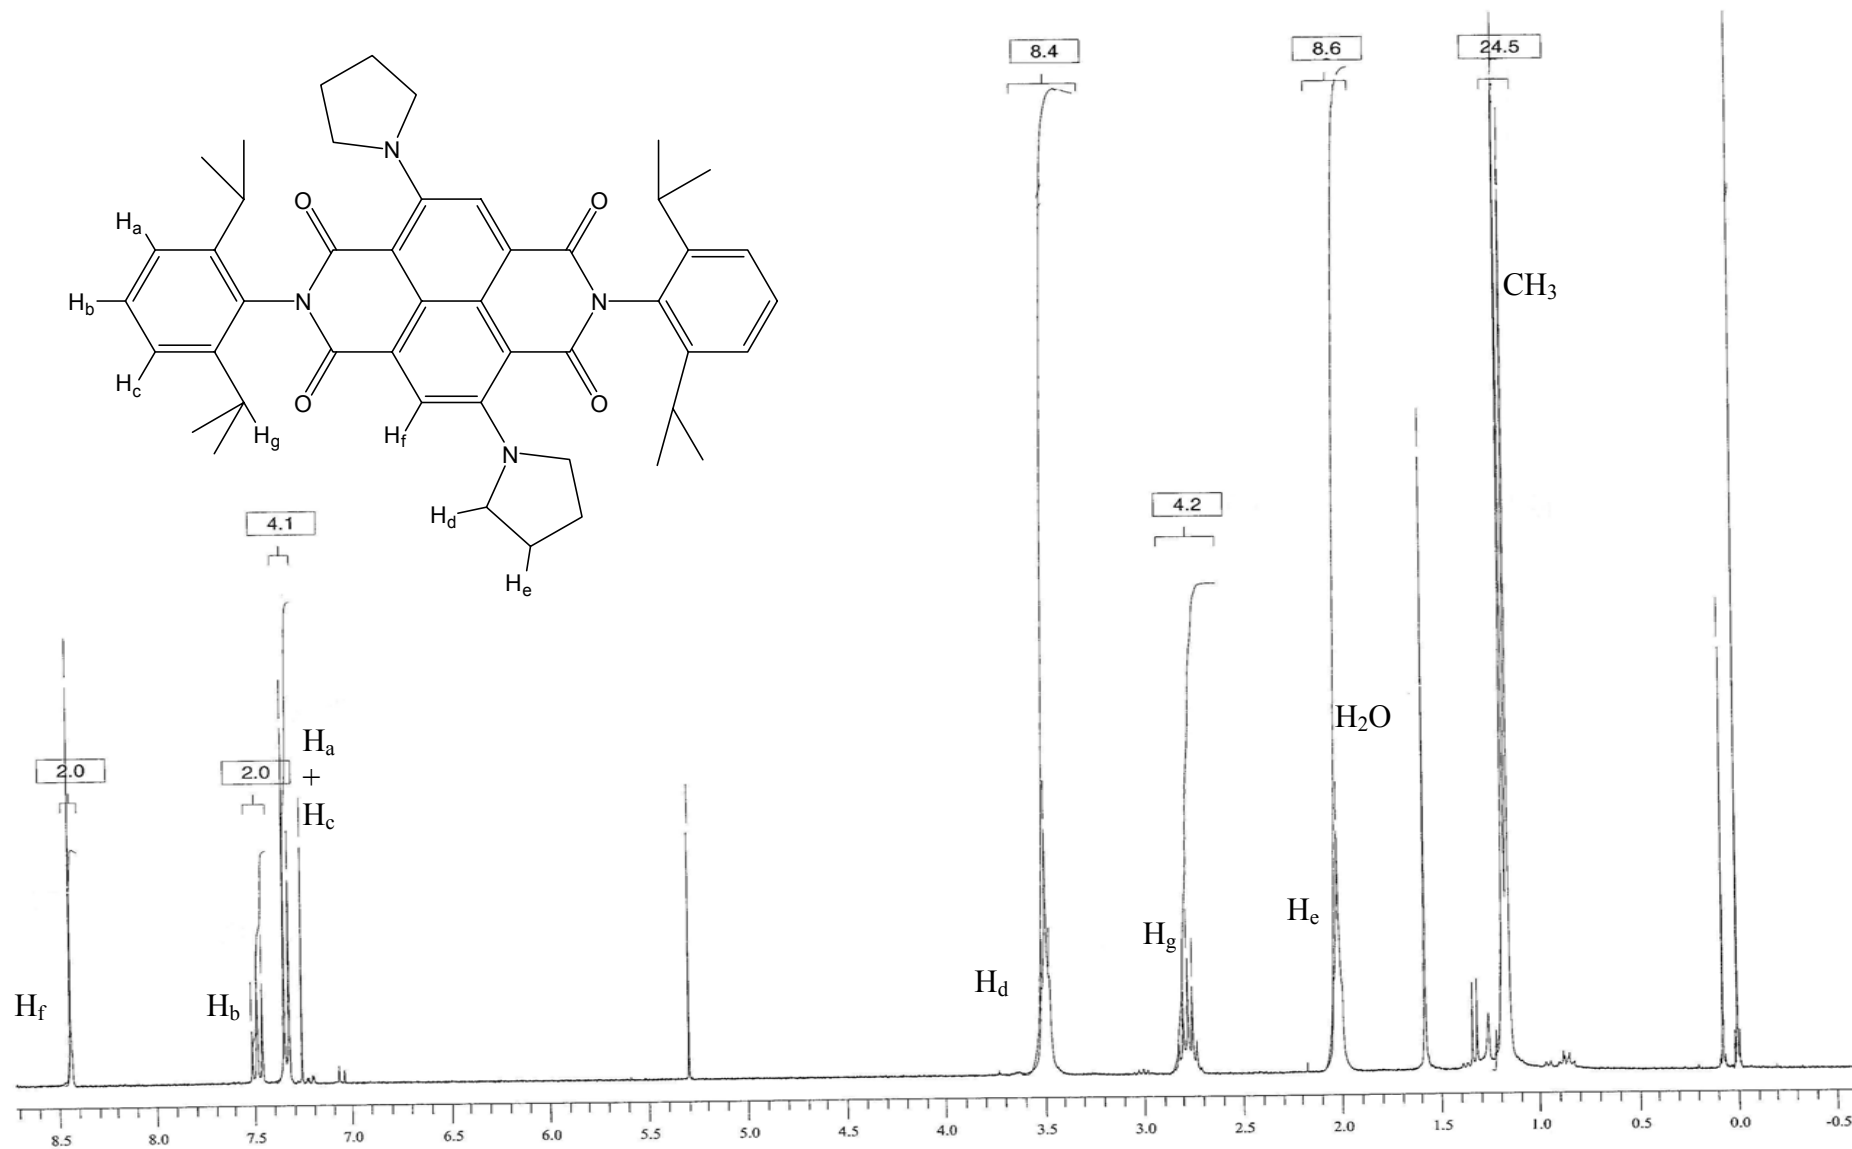

Figure S13:  $^1\text{H}$  NMR spectrum of **6** in  $\text{CDCl}_3$  at 298 K.

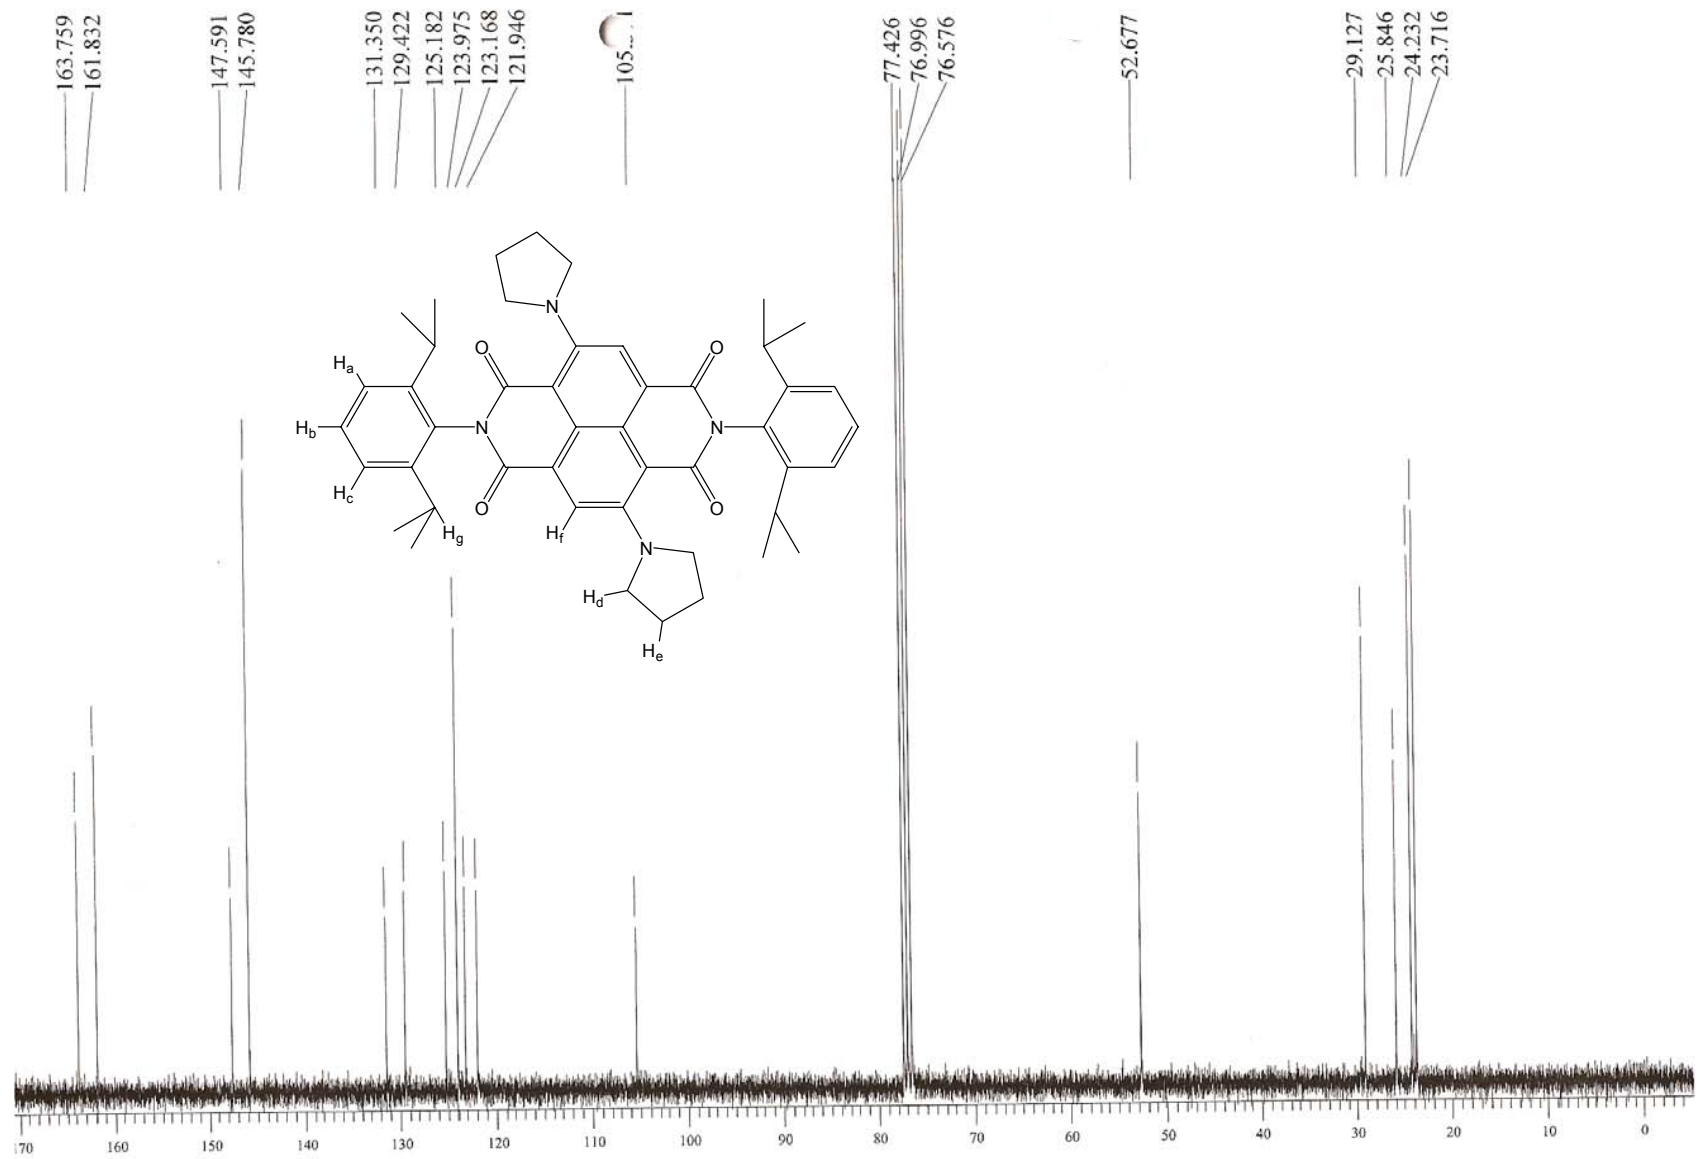

Figure S14:  $^{13}\text{C}$  NMR spectrum of **6** in  $\text{CDCl}_3$  at 298 K.

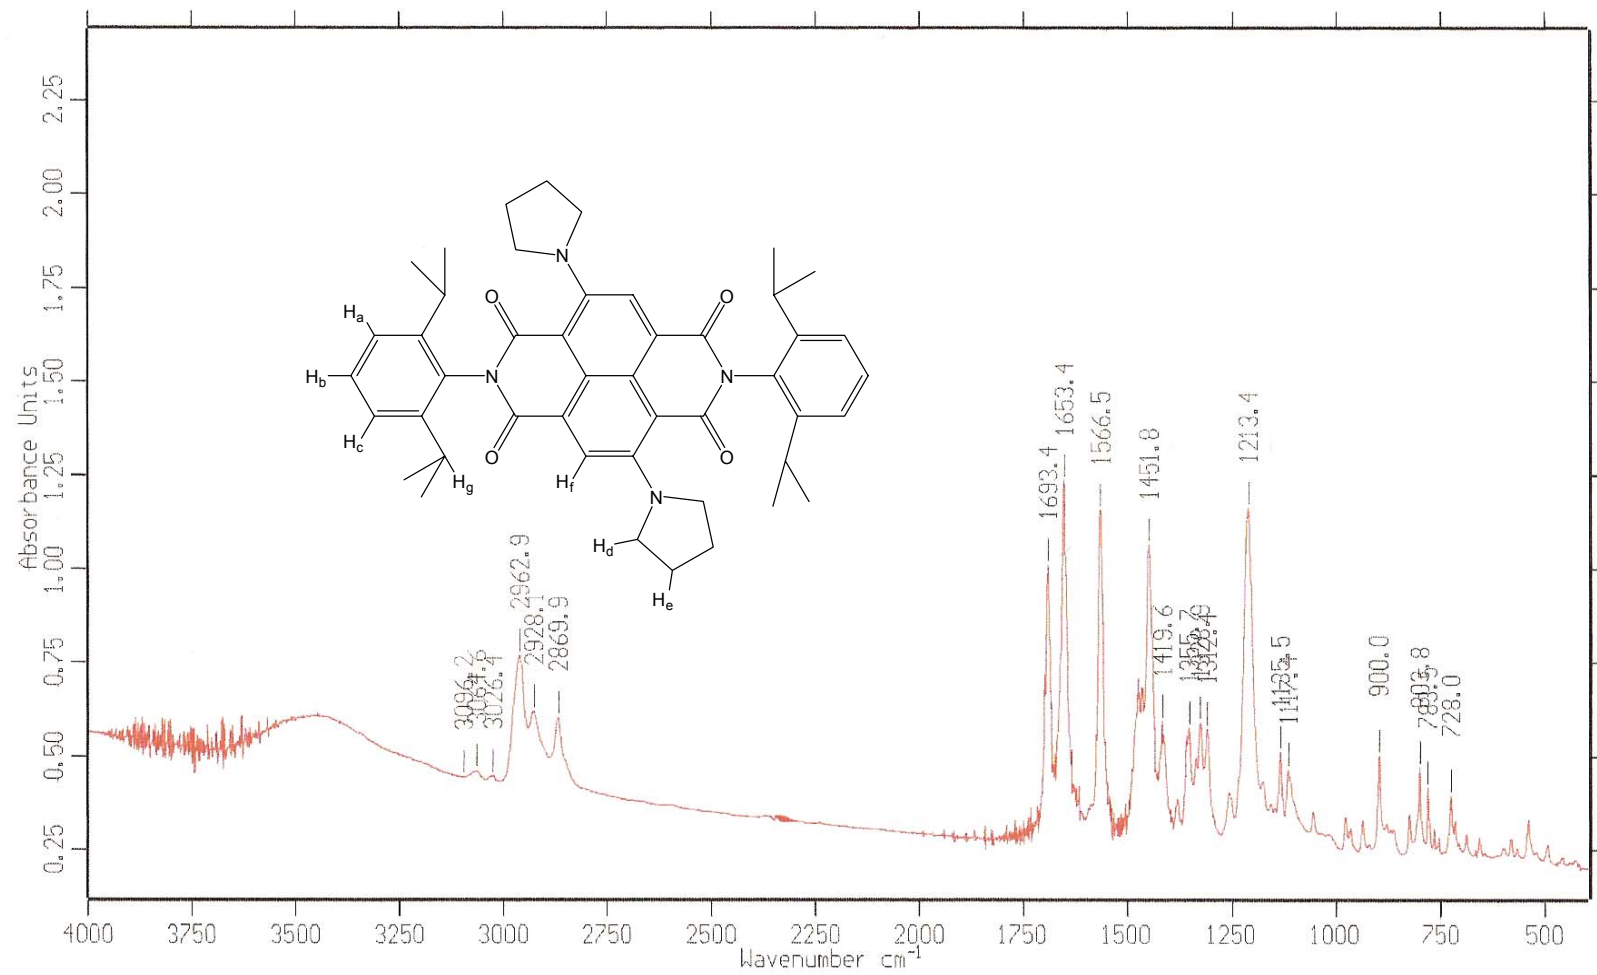

Figure S15: FTIR spectrum of **6** in KBr pastille at 298 K.



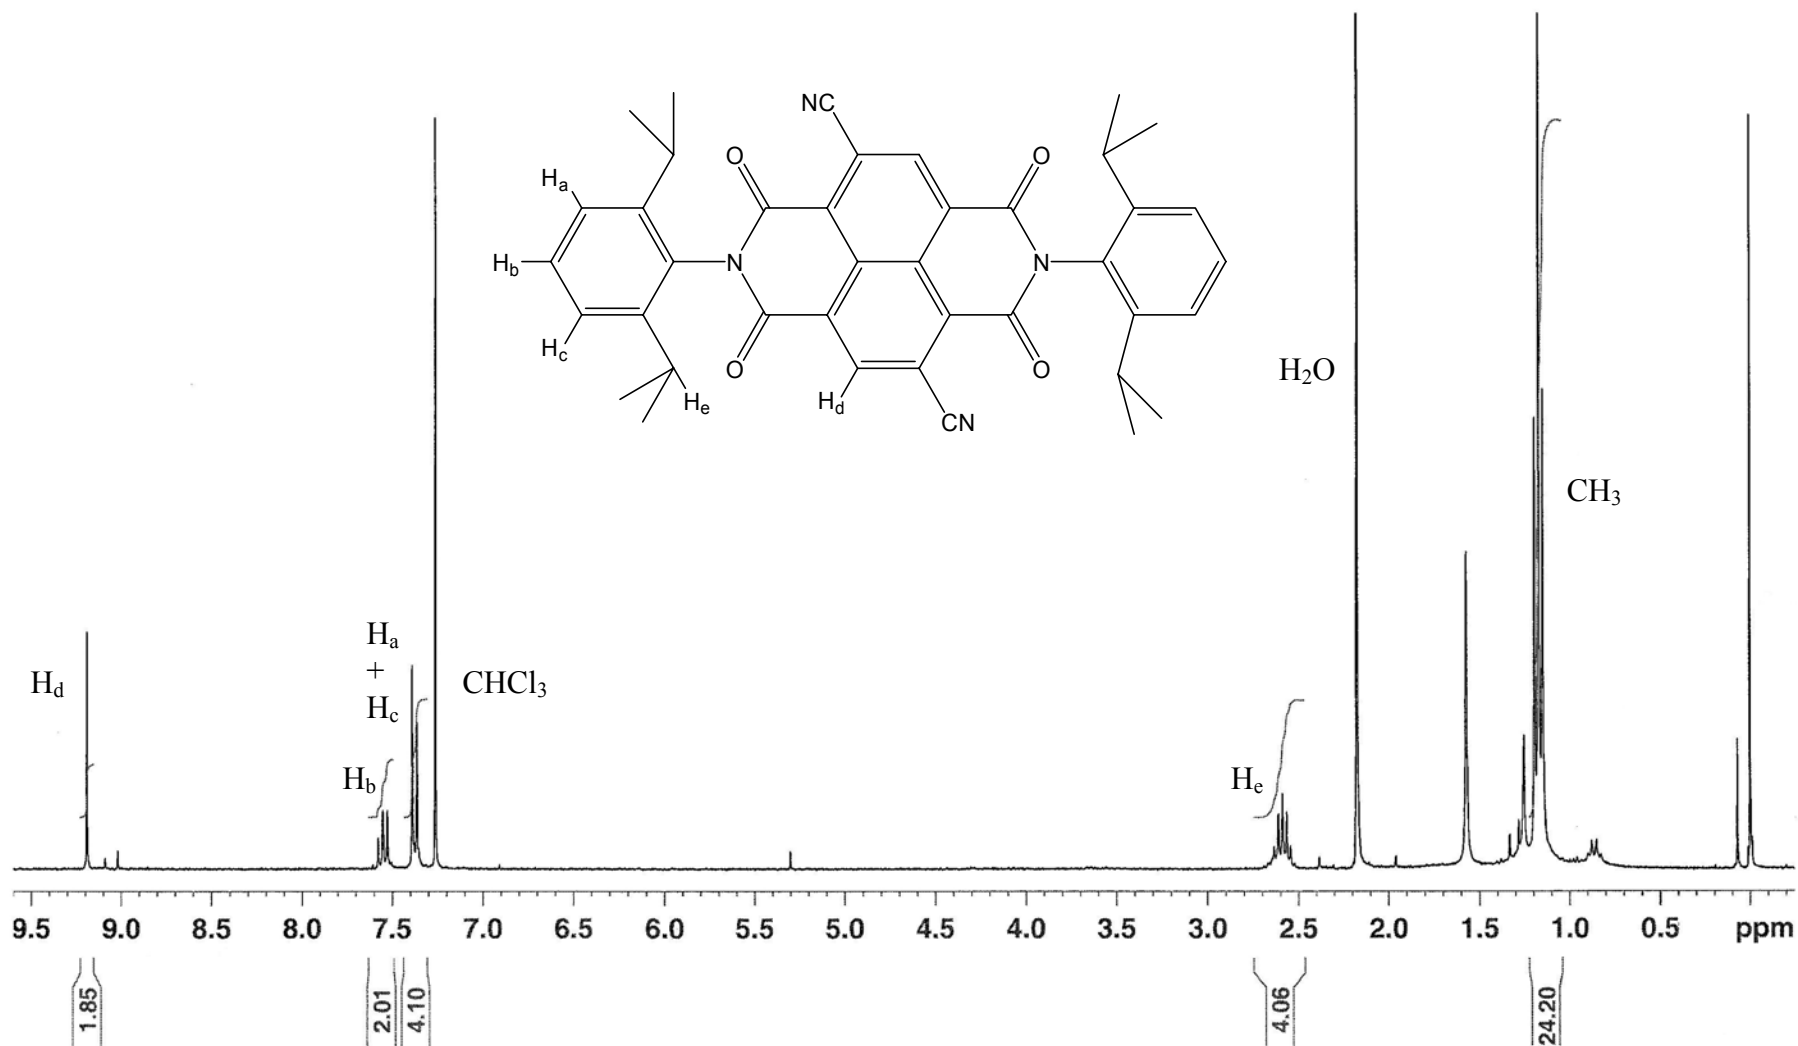

Figure S16:  $^1\text{H}$  NMR spectrum of **7** in  $\text{CDCl}_3$  at 298 K.

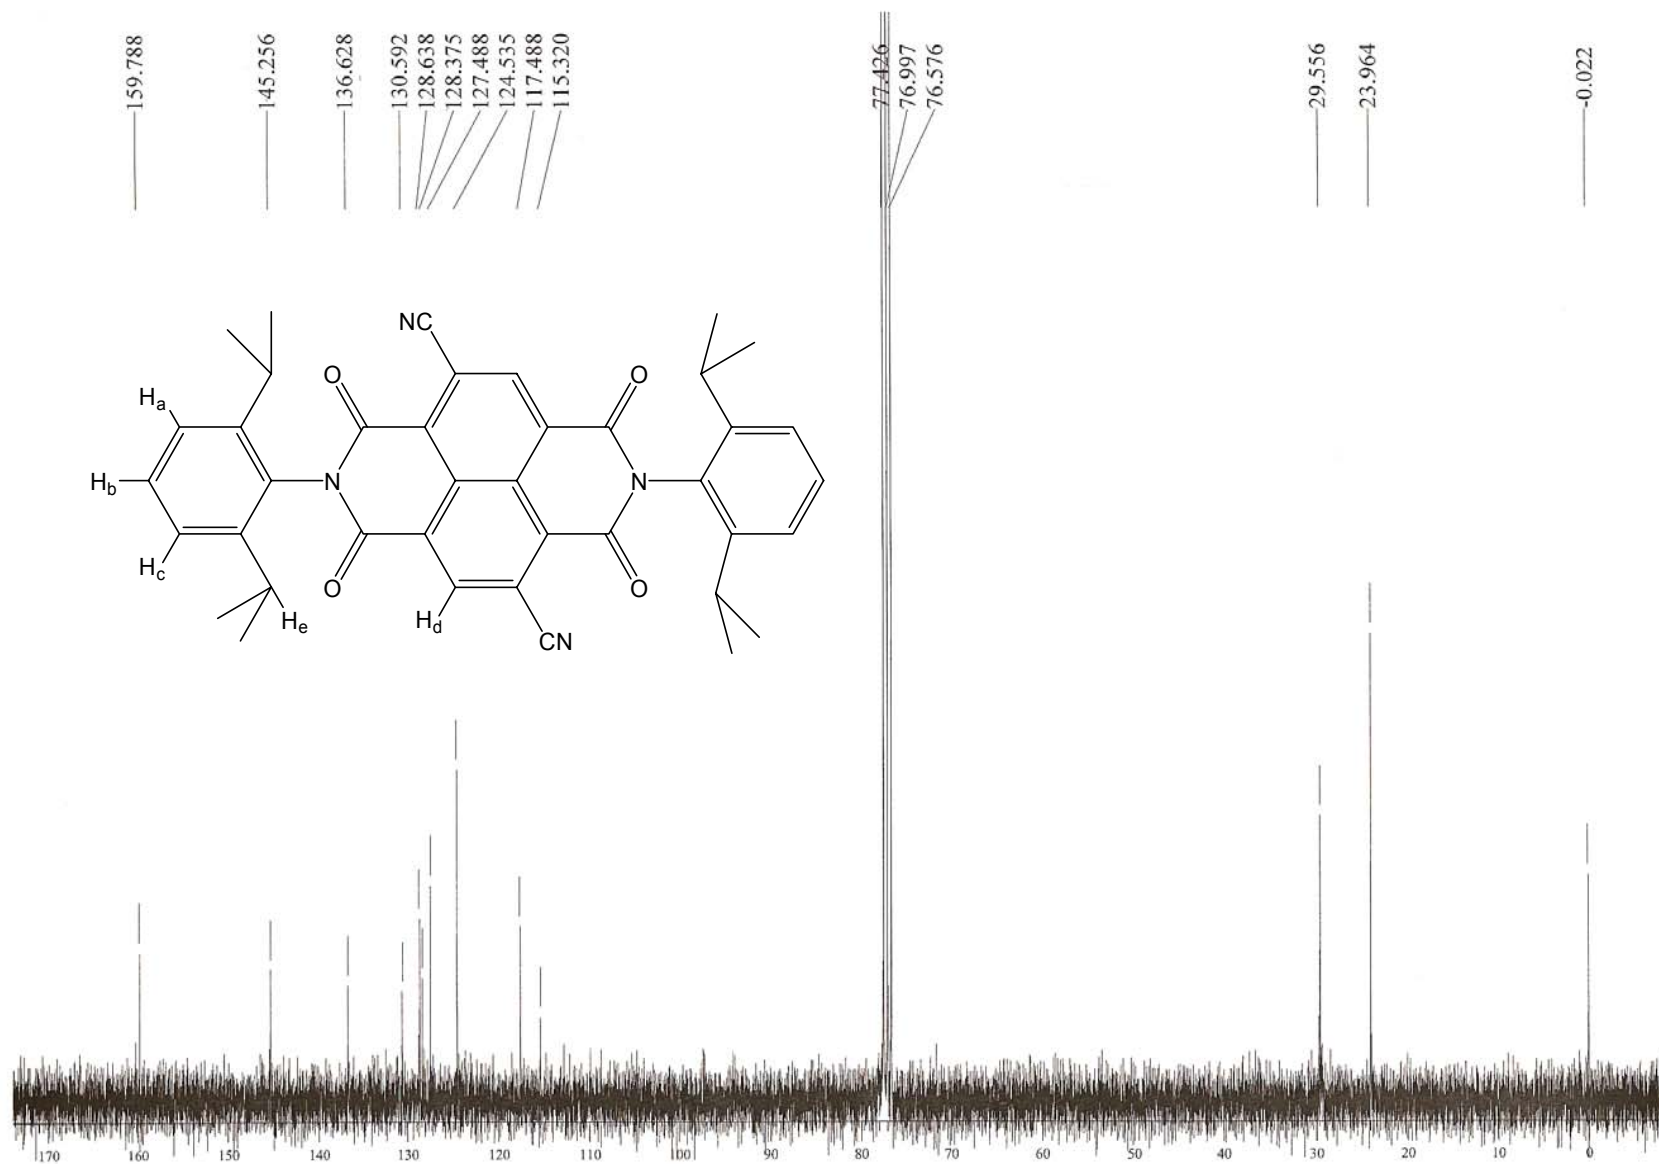

Figure S17:  $^{13}\text{C}$  NMR spectrum of **7** in  $\text{CDCl}_3$  at 298 K.

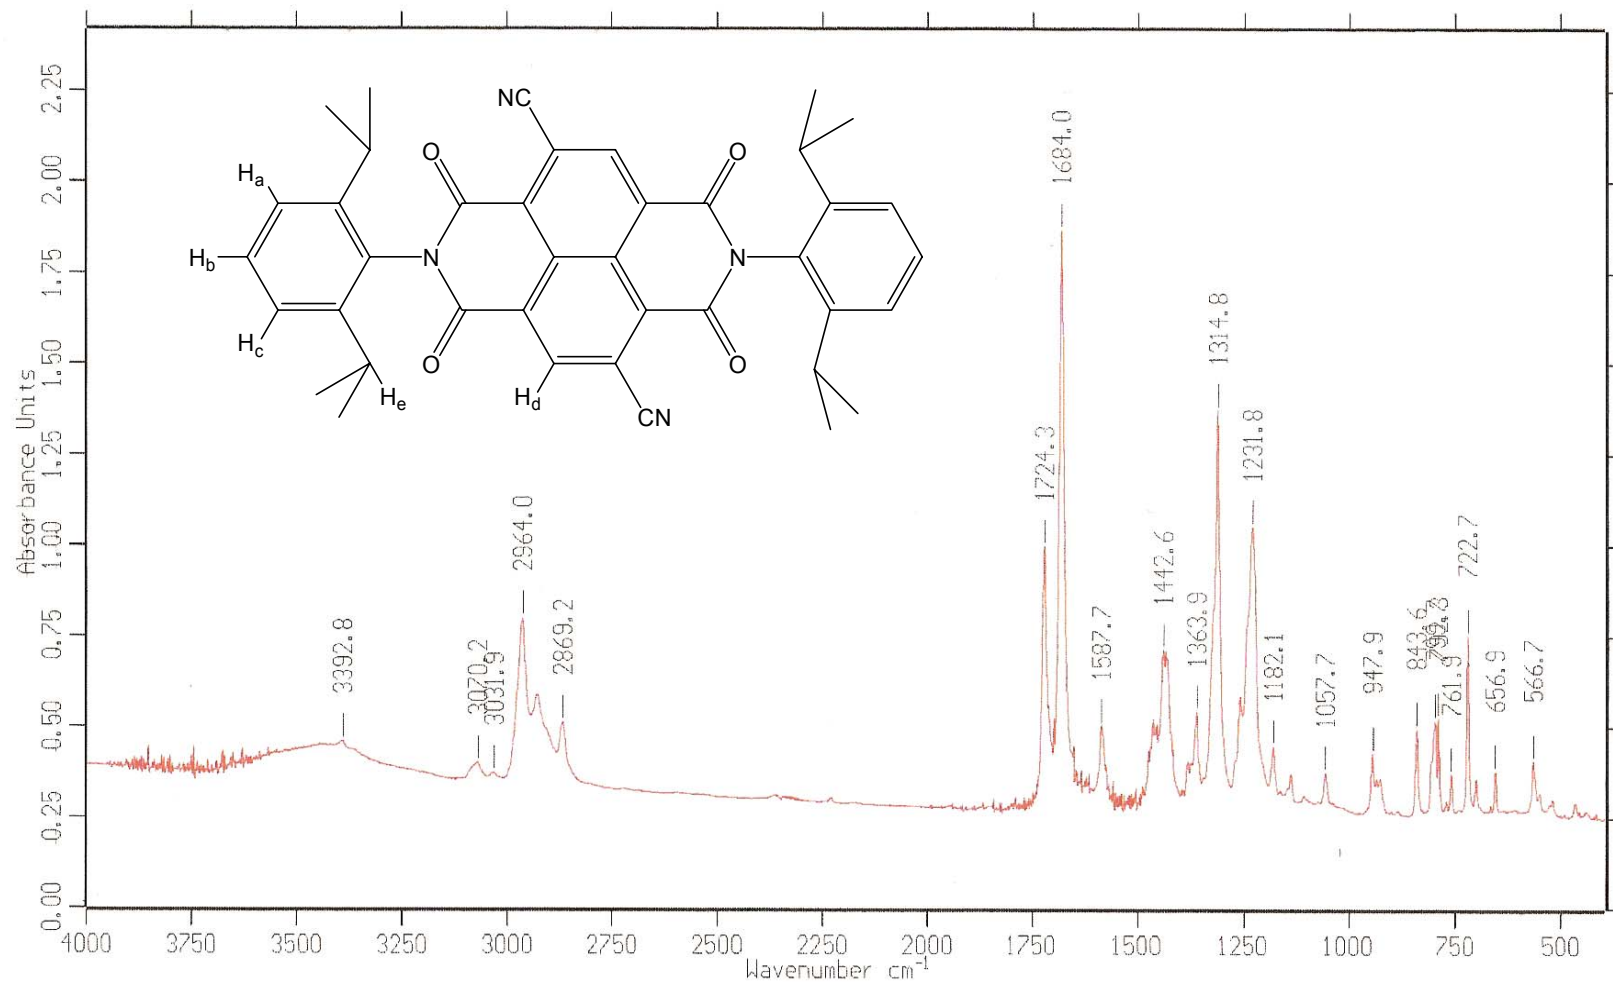

Figure S18: FTIR spectrum of 7 in KBr pastille at 298 K.

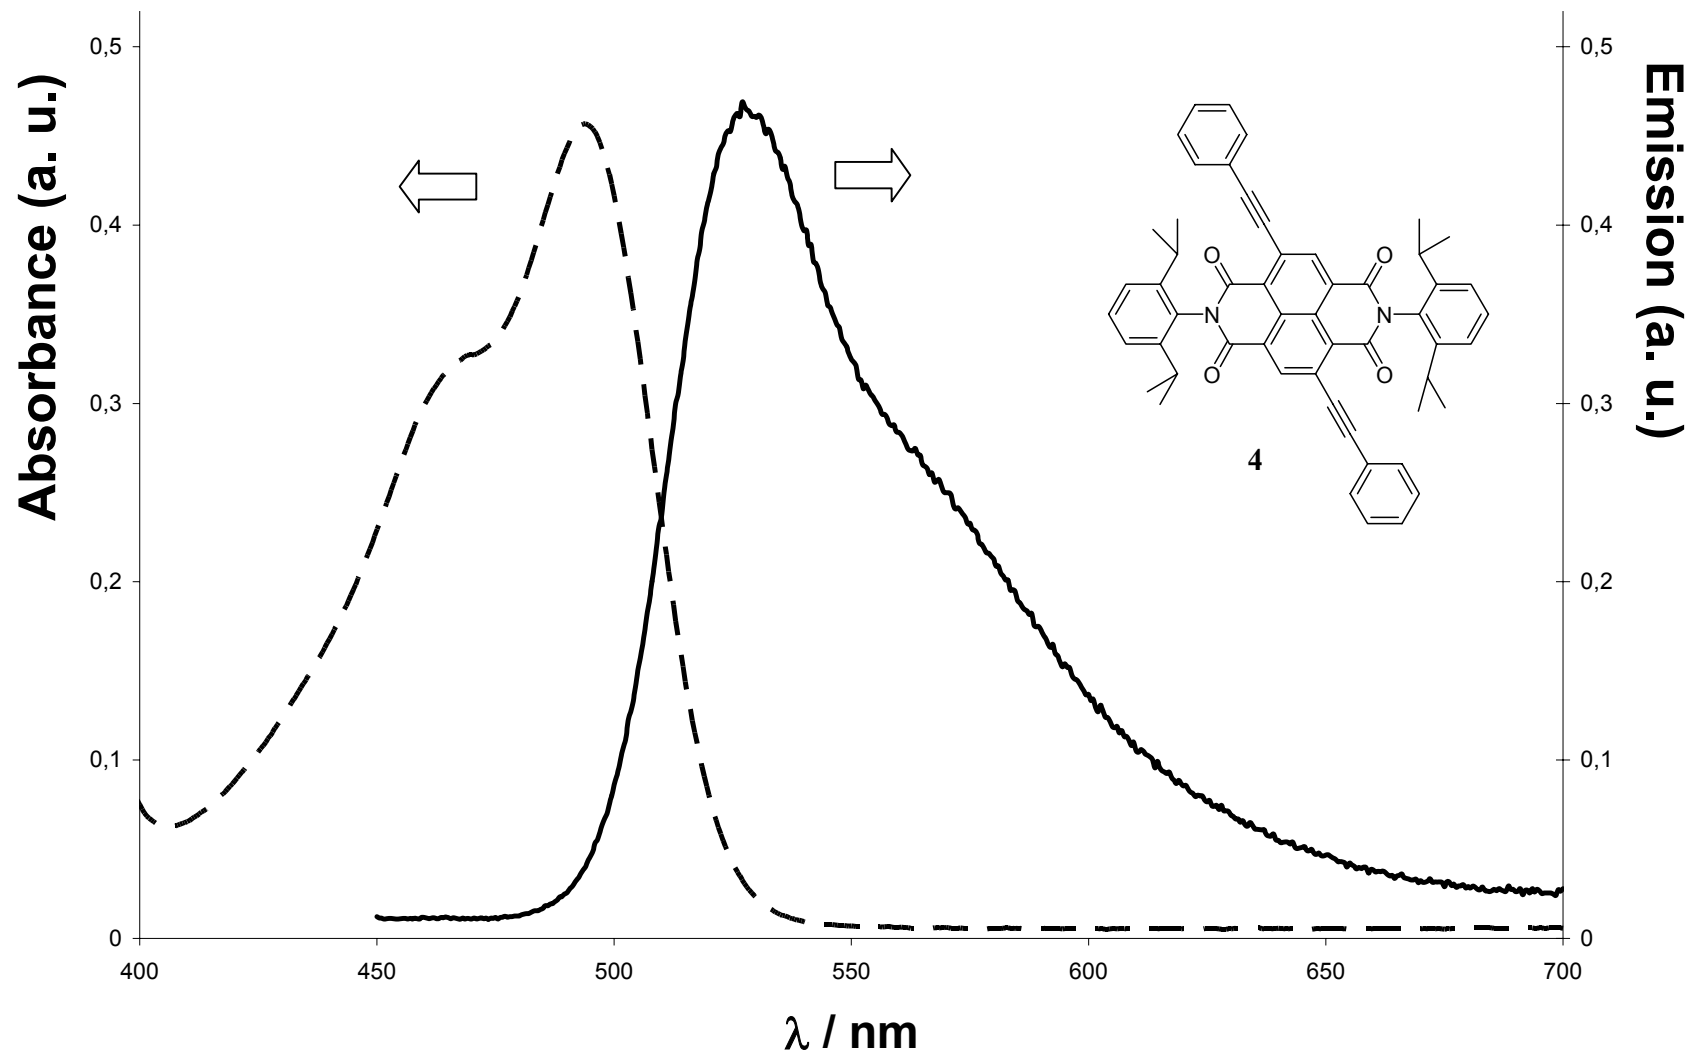

Figure S19: Overlay of the electronic absorption (dashed line) and emission (straight line) spectra of **4** recorded in dichloromethane.

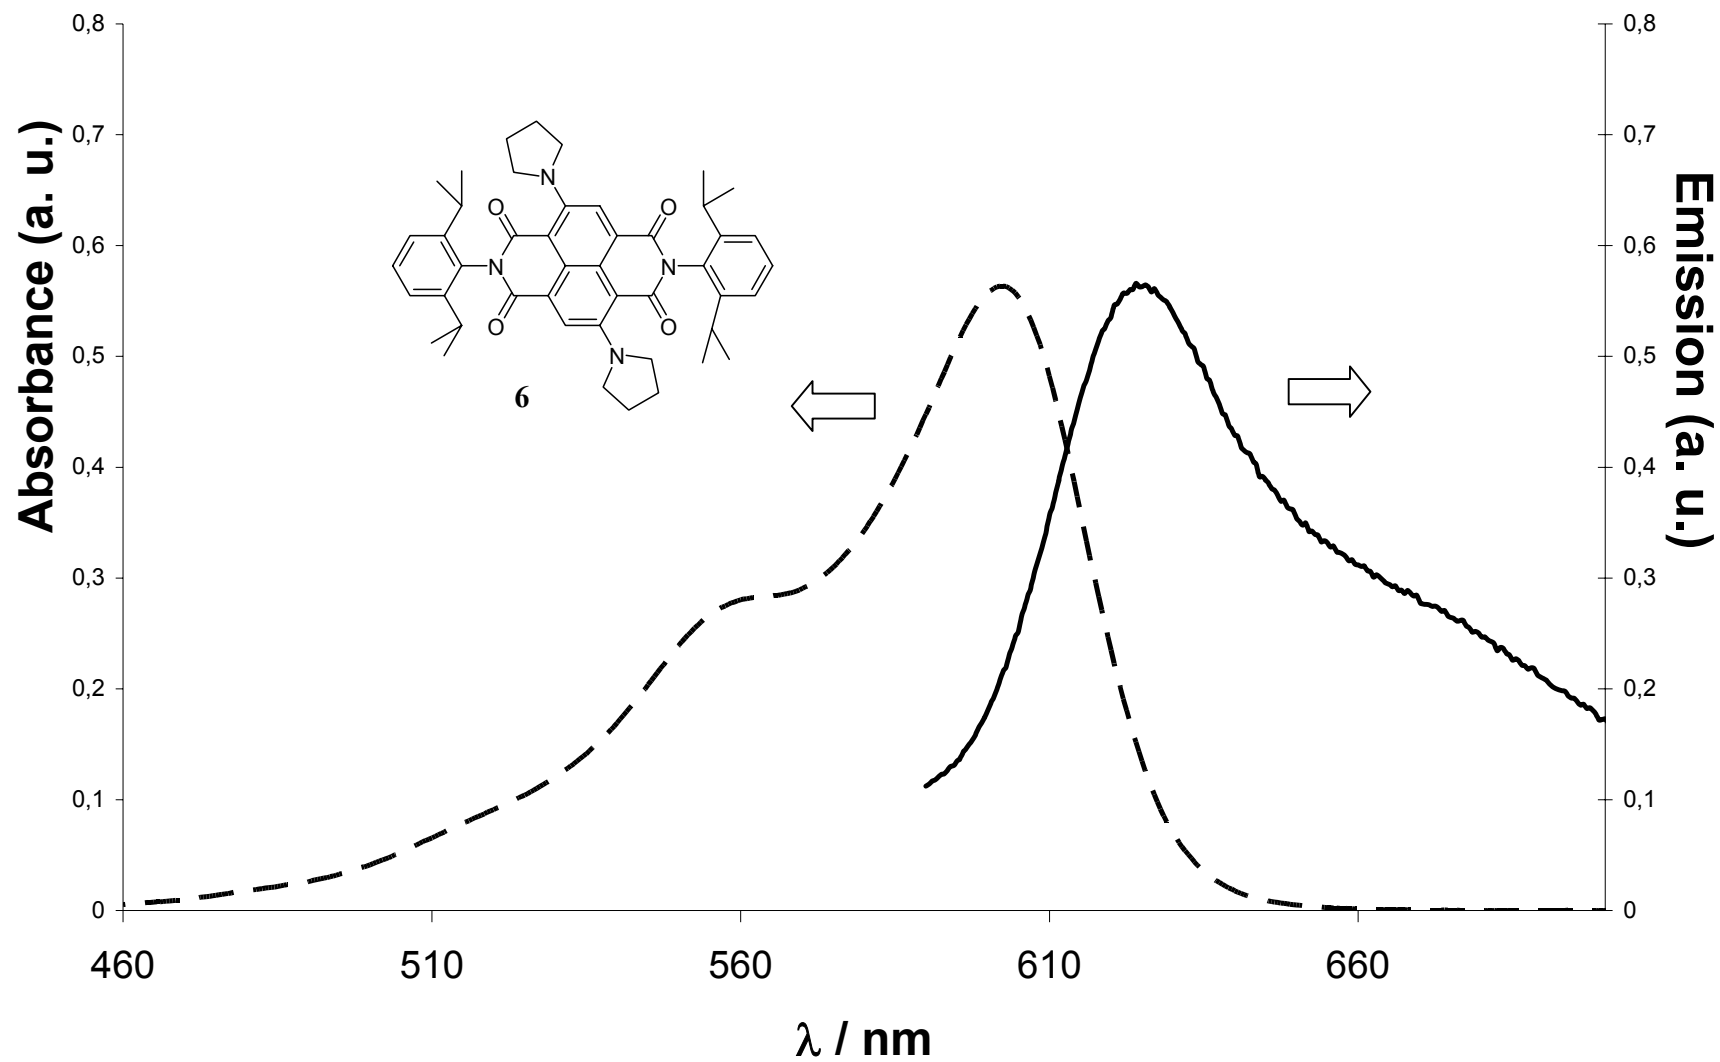

Figure S20: Overlay of the electronic absorption (dashed line) and emission (straight line) spectra of **6** recorded in dichloromethane.

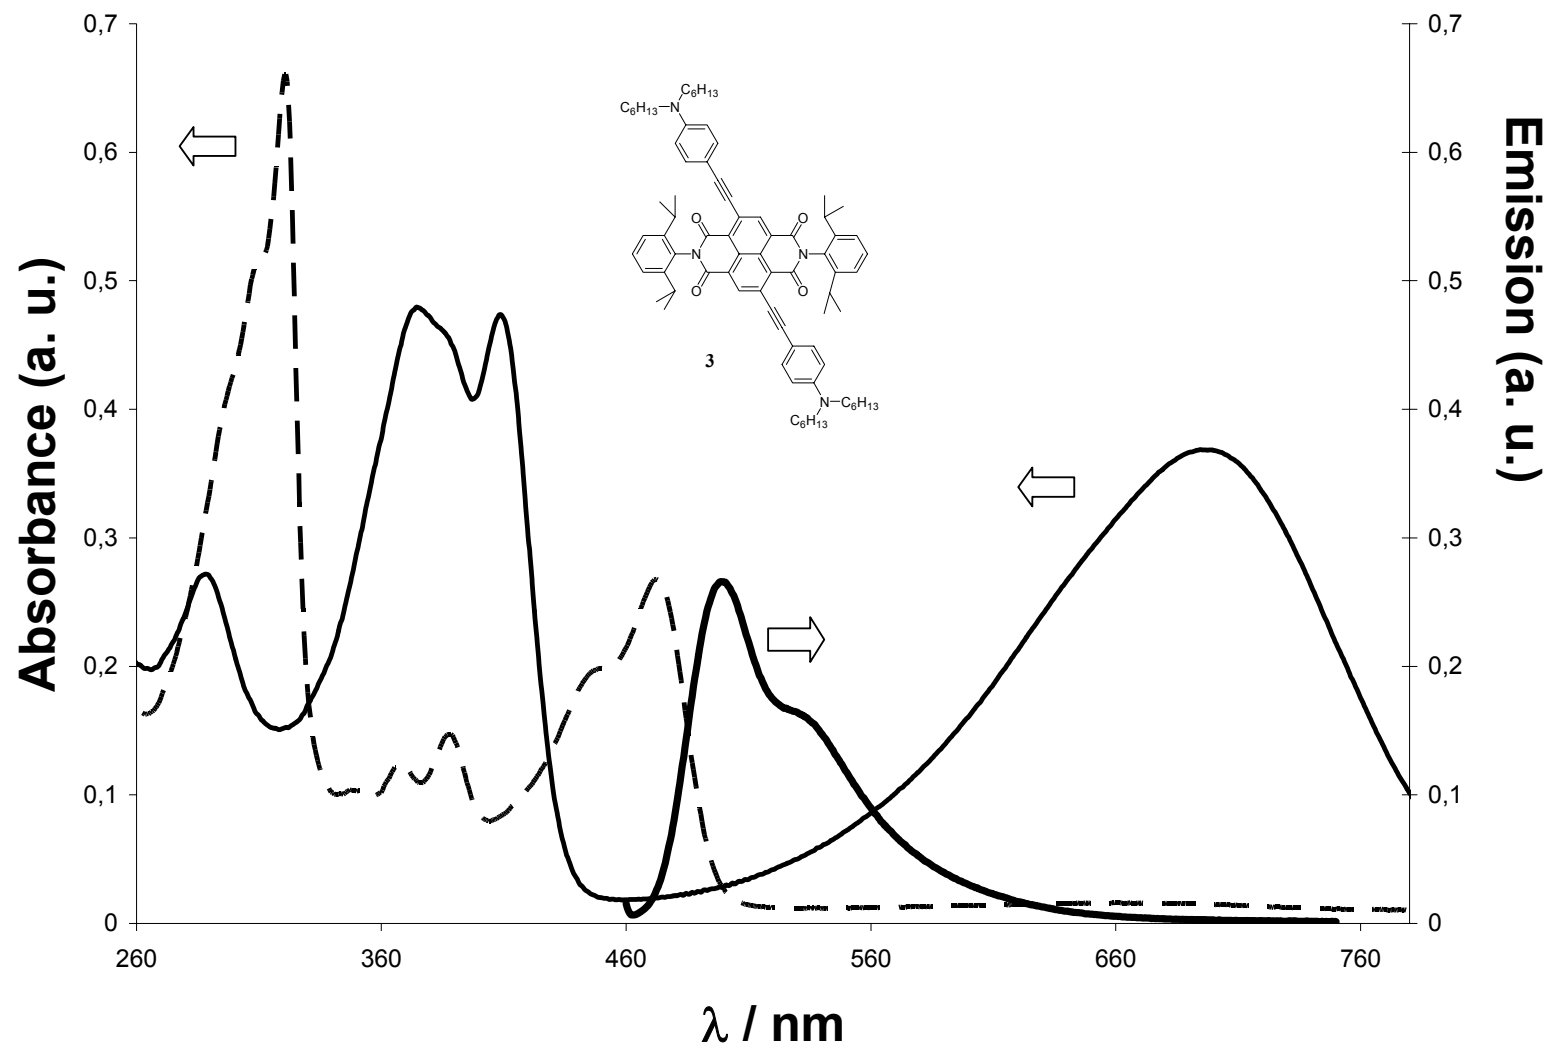

Figure S21: Overlay of the electronic absorption spectrum of **3** in pure dichloromethane (thin straight line), in dichloromethane + HPF<sub>6</sub> (dashed line) and emission spectrum in dichloromethane + HPF<sub>6</sub> (bold straight line).
